# Supplementary material for: Benzoselenophenylpyridine platinum complexes: green versus red phosphorescence towards hybrid OLEDs
Source: Royal Society of Chemistry journal article supplement (doi:10.1039/d0dt00214c), 2020-01-01
Supplement: d0dt00214c1.pdf [file d0dt00214c1.pdf]

## **Benzoselenophenylpyridine platinum complexes: green versus red phosphorescence towards hybrid OLEDs**

Alla Petrenko,<sup>a</sup> Karolis Leitonas<sup>b</sup>, Dmytro Volyniuk<sup>b</sup>, Glib V. Baryshnikov,<sup>c,d</sup> Sergey Belyakov,<sup>a</sup> Boris F. Minaev,<sup>d</sup> Hans Ågren,<sup>c,e</sup> Hranush Durgaryan<sup>b</sup>, Juozas Vidas Gražulevičius,<sup>\*b</sup> Pavel Arsenyan<sup>\*a</sup>

<sup>a</sup> *Latvian Institute of Organic Synthesis, Aizkraukles 21, LV-1006, Riga, Latvia;*  
*e-mail: pavel@osi.lv*

<sup>b</sup> *Kaunas University of Technology, Department of Polymer Chemistry and Technology, Radvilenu pl. 19, LT-50254, Kaunas, Lithuania; e-mail: juozas.grazulevicius@ktu.lt*

<sup>c</sup> *Division of Theoretical Chemistry and Biology, School of Engineering Sciences in Chemistry, Biotechnology and Health, KTH Royal Institute of Technology, 10691, Stockholm, Sweden*

<sup>d</sup> *Department of Chemistry and Nanomaterials Science, Bohdan Khmelnytsky National University, 18031, Cherkasy, Ukraine*

<sup>e</sup> *College of Chemistry and Chemical Engineering, Henan University, Kaifeng, Henan 475004, P. R. China*

## Experimental Section

<sup>1</sup>H, <sup>13</sup>C, and <sup>77</sup>Se NMR spectra were recorded on a Bruker Avance Neo spectrometer at 400.0, 100, and 76 MHz, respectively, at 303 K in CDCl<sub>3</sub>/TMS or DMSO-*d*<sub>6</sub> solution. The <sup>1</sup>H chemical shifts are given relative to TMS, <sup>13</sup>C relative to chloroform or DMSO, and <sup>77</sup>Se relative to dimethyl selenide. Infrared (IR) spectra were recorded with a Prestige-21 FTIR spectrometer (Shimadzu, Kyoto, Japan). GC-MS spectra were recorded on an Agilent 7690 GC instrument with MSD. HRMS spectra were recorded on Waters Synapt GII Q-ToF UPLC/MS.

## Synthesis

**2-(Benzo[*b*]selenophen-3-yl)pyridine 4.** To a solution of 3-iodobenzo[*b*]selenophene (2.5 g, 8.12 mmol), and 2-(trimethylstannyl)pyridine (2.35 g, 9.74 mmol) in dry xylene (25 ml) Pd(PPh<sub>3</sub>)<sub>4</sub> (0.94 g, 0.81 mmol) and triphenylarsine (0.25 g, 0.81 mmol) were added. The resulting mixture was stirred at 110° C for 12 h. The progress of the reaction was followed by TLC. After cooling, the reaction mixture diluted with EtOAc, and filtered. The filtrate was washed with saturated aqueous NaCl solution, dried, and concentrated to give a crude oil. The oil was purified by silica gel chromatography (gradient 0-30% EtOAc, 0-30% CH<sub>2</sub>Cl<sub>2</sub> in pet. Ether) to yield (1.64 g, 78%). <sup>1</sup>H NMR (400 MHz, Chloroform-*d*) δ 8.77 – 8.74 (m, 1H), 8.33 – 8.30 (m, 1H), 8.27 (s, 1H), 7.98 – 7.95 (m, 1H), 7.79 (td, *J* = 7.7, 1.8 Hz, 1H), 7.64 – 7.61 (m, 1H), 7.43 (ddd, *J* = 8.2, 7.2, 1.2 Hz, 1H), 7.37 – 7.33 (m, 1H), 7.29 (ddd, *J* = 7.7, 4.9, 1.2 Hz, 1H). <sup>13</sup>C NMR (101 MHz, Chloroform-*d*) δ 156.0, 149.7, 142.4, 140.4, 139.7, 136.8, 129.6, 126.0, 125.9, 124.9, 124.9, 123.4, 122.2.

**Complex 3: (a) Intermediate 2:** To a mixture of **1** (233 mg, 0.9 mmol) in 2-methoxyethanol (20 mL) a solution of K<sub>2</sub>PtCl<sub>4</sub> (150 mg, 0.36 mmol) in water (7 mL) was added, and the mixture was heated at 120 °C for 16 h under inert atmosphere. After cooling, 80 mL of water was added, and precipitates were collected by filtration. The precipitates was washed with methanol (15 mL) and hexane (20 mL) to afford **2** as a yellow solid 204 mg, (75%). <sup>1</sup>H NMR (400 MHz, Chloroform-*d*) δ 9.63 (ddd, *J* = 5.9, 1.6, 0.8 Hz, 1H), 9.34 (ddd, *J* = 5.9, 1.6, 0.8 Hz, 1H), 8.12 (d, *J* = 0.8 Hz, 1H), 8.07 (ddd, *J* = 8.2, 1.6, 0.8 Hz, 1H), 7.99 (ddd, *J* = 8.2, 7.4, 1.6 Hz, 1H), 7.86 – 7.81 (m, 1H), 7.81 – 7.73 (m, 2H), 7.72 (dp, *J* = 8.0, 0.7 Hz, 1H), 7.36 – 7.27 (m, 3H), 7.23 (ddd, *J* = 8.4, 7.2, 1.4 Hz, 1H), 7.10 (ddd, *J* = 8.0, 7.1, 1.3 Hz, 1H), 7.02 (ddd, *J* = 7.4, 5.9, 1.4 Hz, 1H), 6.87 (ddd, *J* =

8.3, 7.1, 1.2 Hz, 1H), 6.25 – 6.14 (m, 1H). HRMS (ESI): calcd for  $C_{26}H_{17}ClN_2PtSe_2$   $[M-Cl]^+$  711.9375, found 711.9380. (b) A mixture of **2** (100 mg, 0.13 mmol), 2,2,6,6-tetramethylheptane-3,5-dione (48 mg, 0.26 mmol), and  $Ag_2O$  (45 mg, 0.19 mmol) in 2-methoxyethanol (8 mL) was heated at 110°C for 30 h under inert atmosphere. After cooling, chloroform (100 mL) and water (50 mL) were added, and the mixture was vigorously shaken. The organic layer was separated, and the aqueous layer was extracted with chloroform (100 mL  $\times$  2). The combined organic layers were washed with water (50 mL  $\times$  2) and saturated aqueous NaCl solution (100 mL), and then dried over anhydrous  $Na_2SO_4$ . Then volatiles were removed and the residue was purified by silica gel column chromatography (chloroform as eluent) to afford **3** as a yellow solid (75 mg, 91%).  $^1H$  NMR (400 MHz, Chloroform-*d*)  $\delta$  9.15 – 9.12 (m, 1H), 8.99 (ddd,  $J = 5.8, 1.5, 0.8$  Hz, 1H), 7.89 – 7.85 (m, 1H), 7.73 – 7.68 (m, 1H), 7.35 (ddd,  $J = 8.1, 7.0, 1.5$  Hz, 1H), 7.30 – 7.23 (m, 1H), 6.94 (ddd,  $J = 7.4, 5.9, 1.5$  Hz, 1H), 5.92 (s, 1H), 1.35 (s, 9H), 1.30 (s, 1H).  $^{13}C$  NMR (101 MHz, Chloroform-*d*)  $\delta$  194.9, 193.7, 166.7, 148.4, 146.4, 143.7, 143.5, 138.9, 137.9, 129.1, 125.7, 125.5, 124.3, 119.1, 118.6, 93.8, 41.8, 41.6, 29.0, 28.5.  $^{77}Se$  NMR (76 MHz, Chloroform-*d*)  $\delta$  481.9. HRMS (ESI): calcd for  $C_{20}H_{24}N_7PtSe$   $[M]^+$  636.0855, found 636.0905. Elemental analysis calcd. for  $C_{24}H_{27}NO_2PtSe$ : C, 45.36; H, 4.28; N, 2.20; found: C, 45.11; H, 4.21; N, 2.14.

Complex **6**: (a) Intermediate **5**: To a mixture of **4** (233 mg, 0.9 mmol) in 2-methoxyethanol (20 mL) a solution of  $K_2PtCl_4$  (150 mg, 0.36 mmol) in water (7 mL) was added, and the mixture was heated at 120 °C for 120 h under inert atmosphere. After cooling, 80 mL of water was added, and precipitates were collected by filtration. The precipitates were washed with methanol (15 mL) and hexane (20 mL) to afford **5** as a yellow solid 173 mg, (64 %). HRMS (ESI):  $C_{26}H_{17}ClN_2PtSe_2$   $[M+H]^+$  747.9060, found 747.8977. (b) A mixture of **5** (156 mg, 0.2 mmol), 2,2,6,6-tetramethylheptane-3,5-dione (70 mg, 0.41 mmol), and  $Ag_2O$  (70 mg, 0.31 mmol) in 2-methoxyethanol (16 mL) was heated at 110°C for 120 h under inert atmosphere. After cooling, chloroform (100 mL) and water (50 mL) were added, and the mixture was vigorously shaken. The organic layer was separated, and the aqueous layer was extracted with chloroform (100 mL  $\times$  2). The combined organic layers were washed with water (50 mL  $\times$  2) and saturated aqueous NaCl solution (100 mL), and then dried over anhydrous  $Na_2SO_4$ . The solvent was removed under reduced pressure and the residue

was purified by silica gel column chromatography (chloroform as eluent) to afford **6** as a yellow solid (23 mg, 18 %).  $^1\text{H}$  NMR (400 MHz, Chloroform-*d*)  $\delta$  8.89 (dt,  $J = 5.8, 1.3$  Hz, 1H), 8.01 (d,  $J = 7.8$  Hz, 1H), 7.91 – 7.86 (m, 1H), 7.84 – 7.81 (m, 2H), 7.33 (ddd,  $J = 8.2, 7.2, 1.3$  Hz, 1H), 7.17 (m, 1H), 7.06 – 7.01 (m, 1H), 5.88 (s, 1H), 1.30 (s, 9H), 1.29 (s, 1H).  $^{13}\text{C}$  NMR (101 MHz, Chloroform-*d*)  $\delta$  195.5, 194.2, 165.1, 164.7, 147.7, 142.6, 139.4, 126.7, 124.6, 122.0, 120.2, 118.5, 117.8, 93.7, 41.7, 41.6, 28.7, 28.5.  $^{77}\text{Se}$  NMR (76 MHz, Chloroform-*d*)  $\delta$  560.2. HRMS (ESI): calcd for  $\text{C}_{20}\text{H}_{24}\text{N}_7\text{PtSe} [\text{M}]^+$  636.0855, found 636.0889. Elemental analysis calcd. for  $\text{C}_{24}\text{H}_{27}\text{NO}_2\text{PtSe}$ : C, 45.36; H, 4.28; N, 2.20; found: C, 45.08; H, 4.34; N, 2.15.

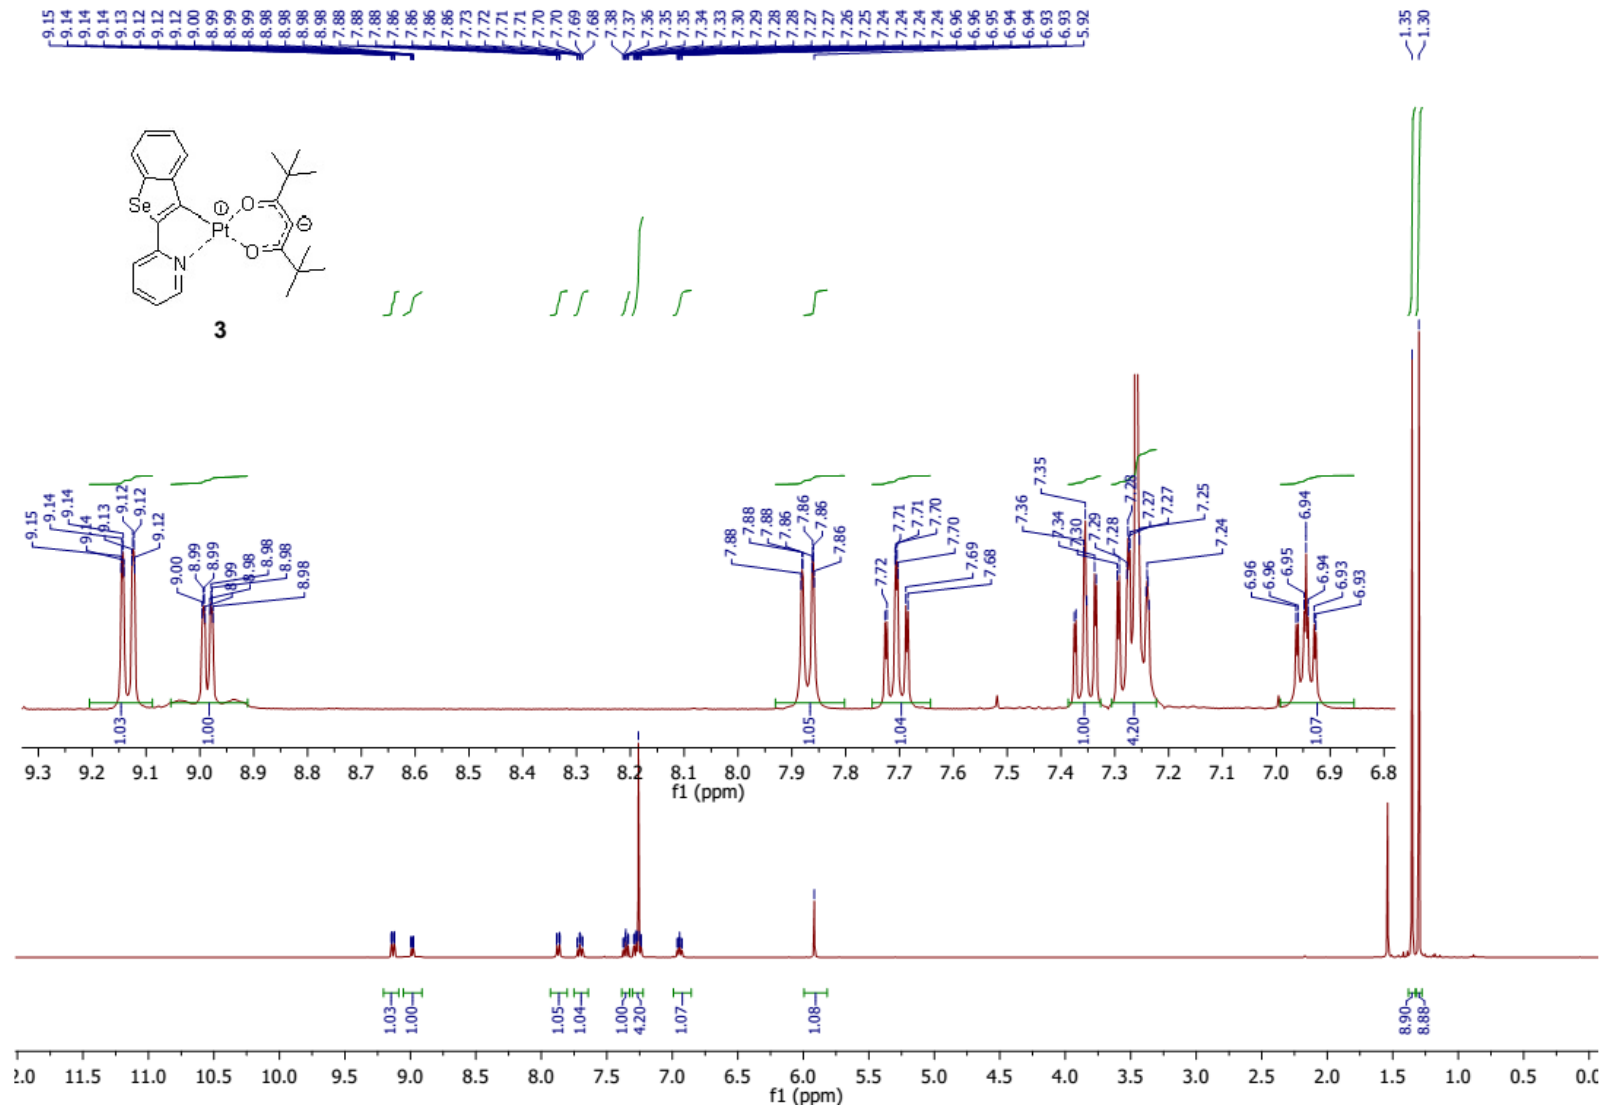

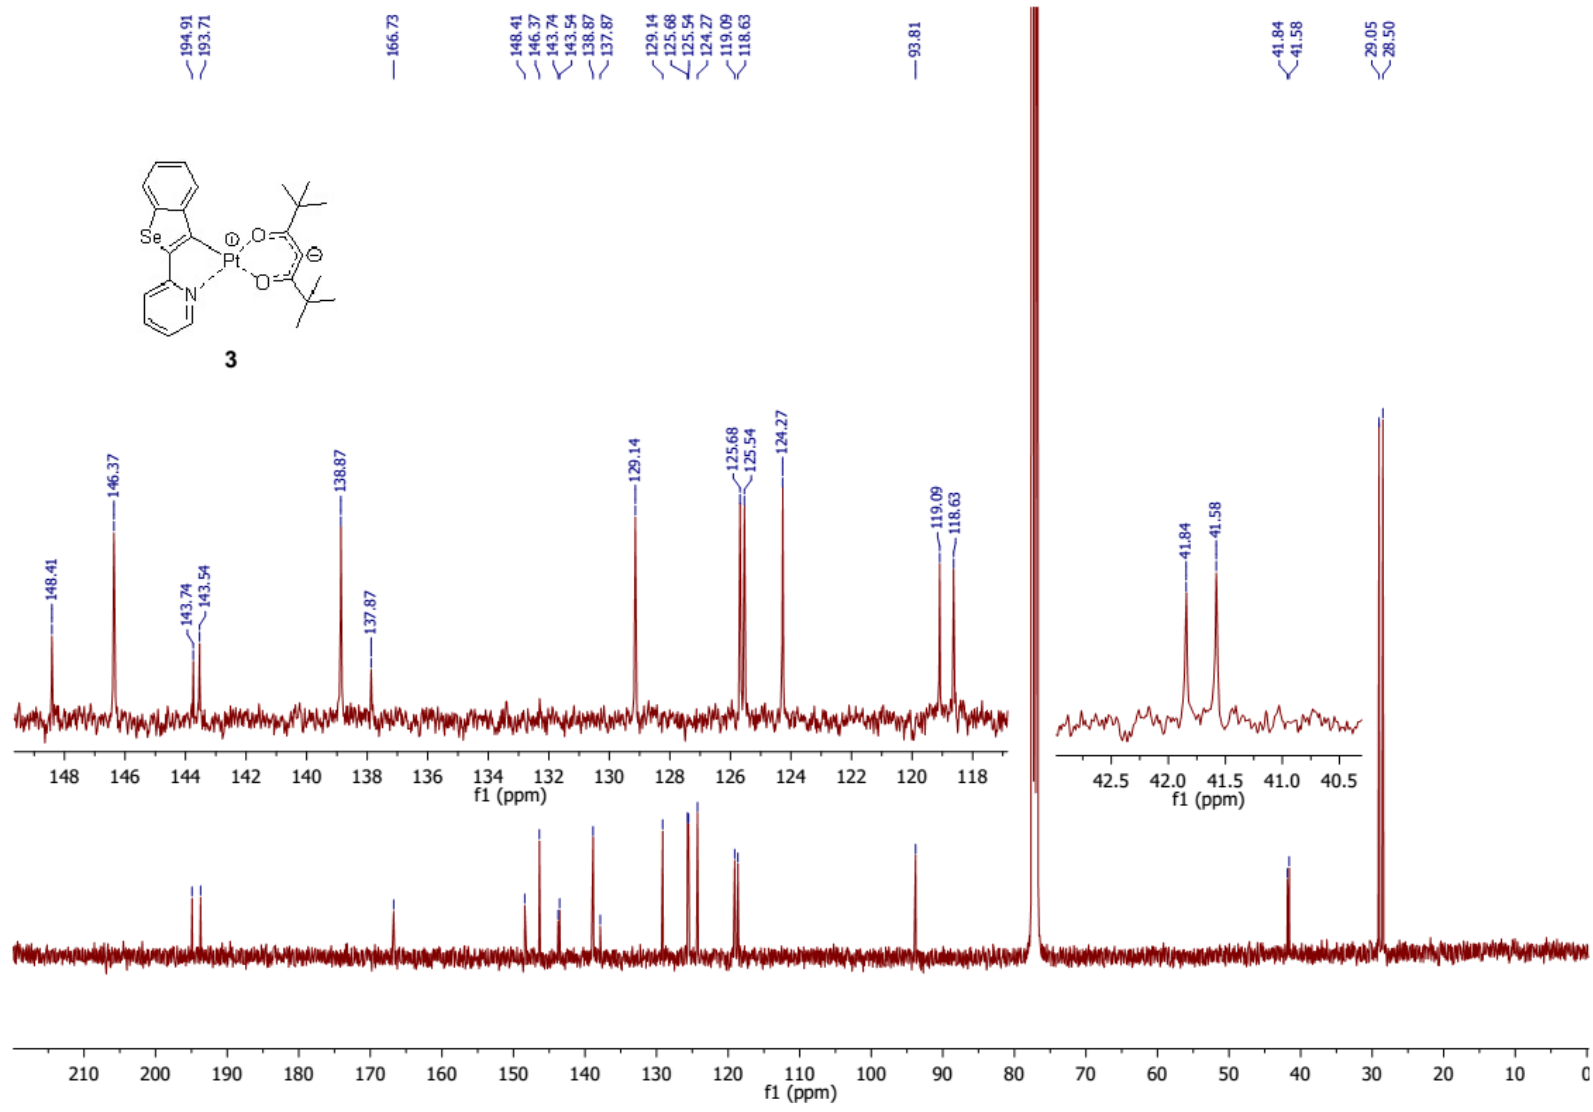

HRMS. Compound 3

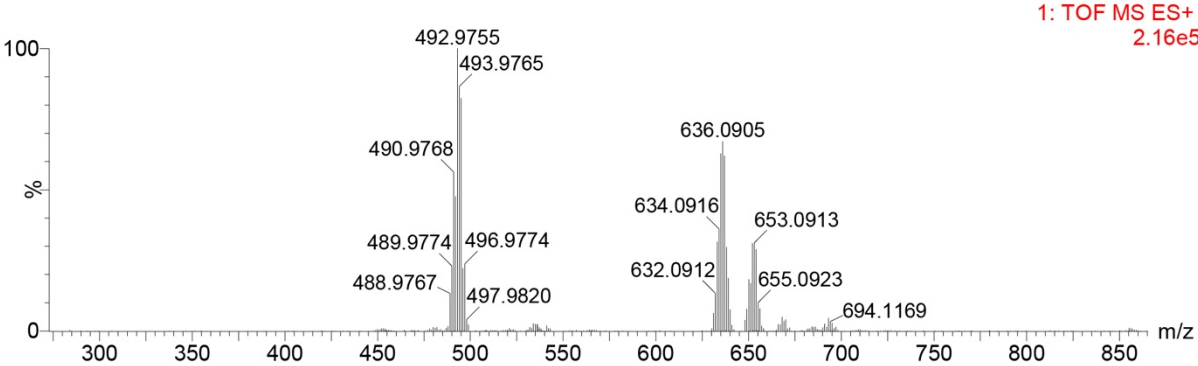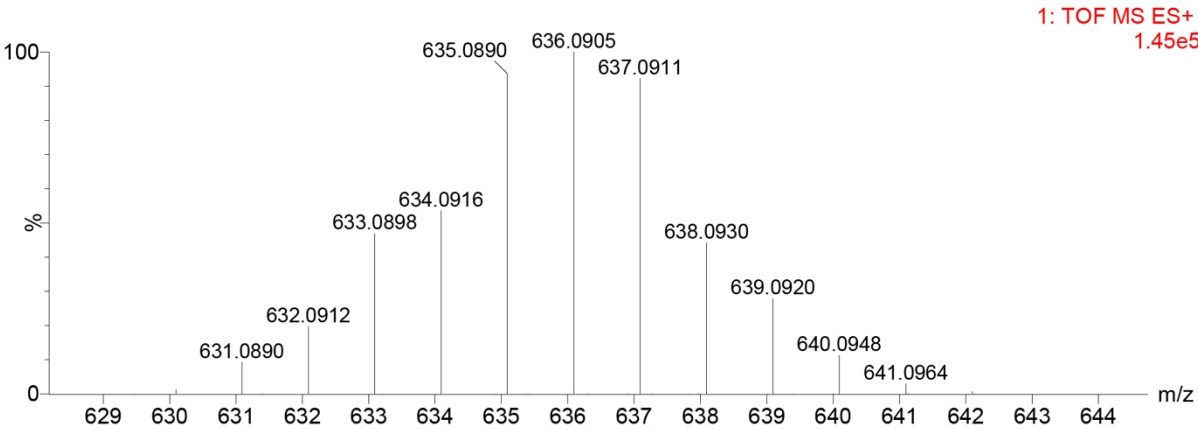

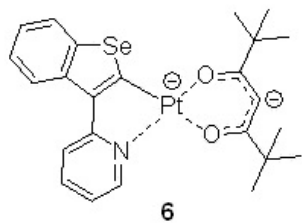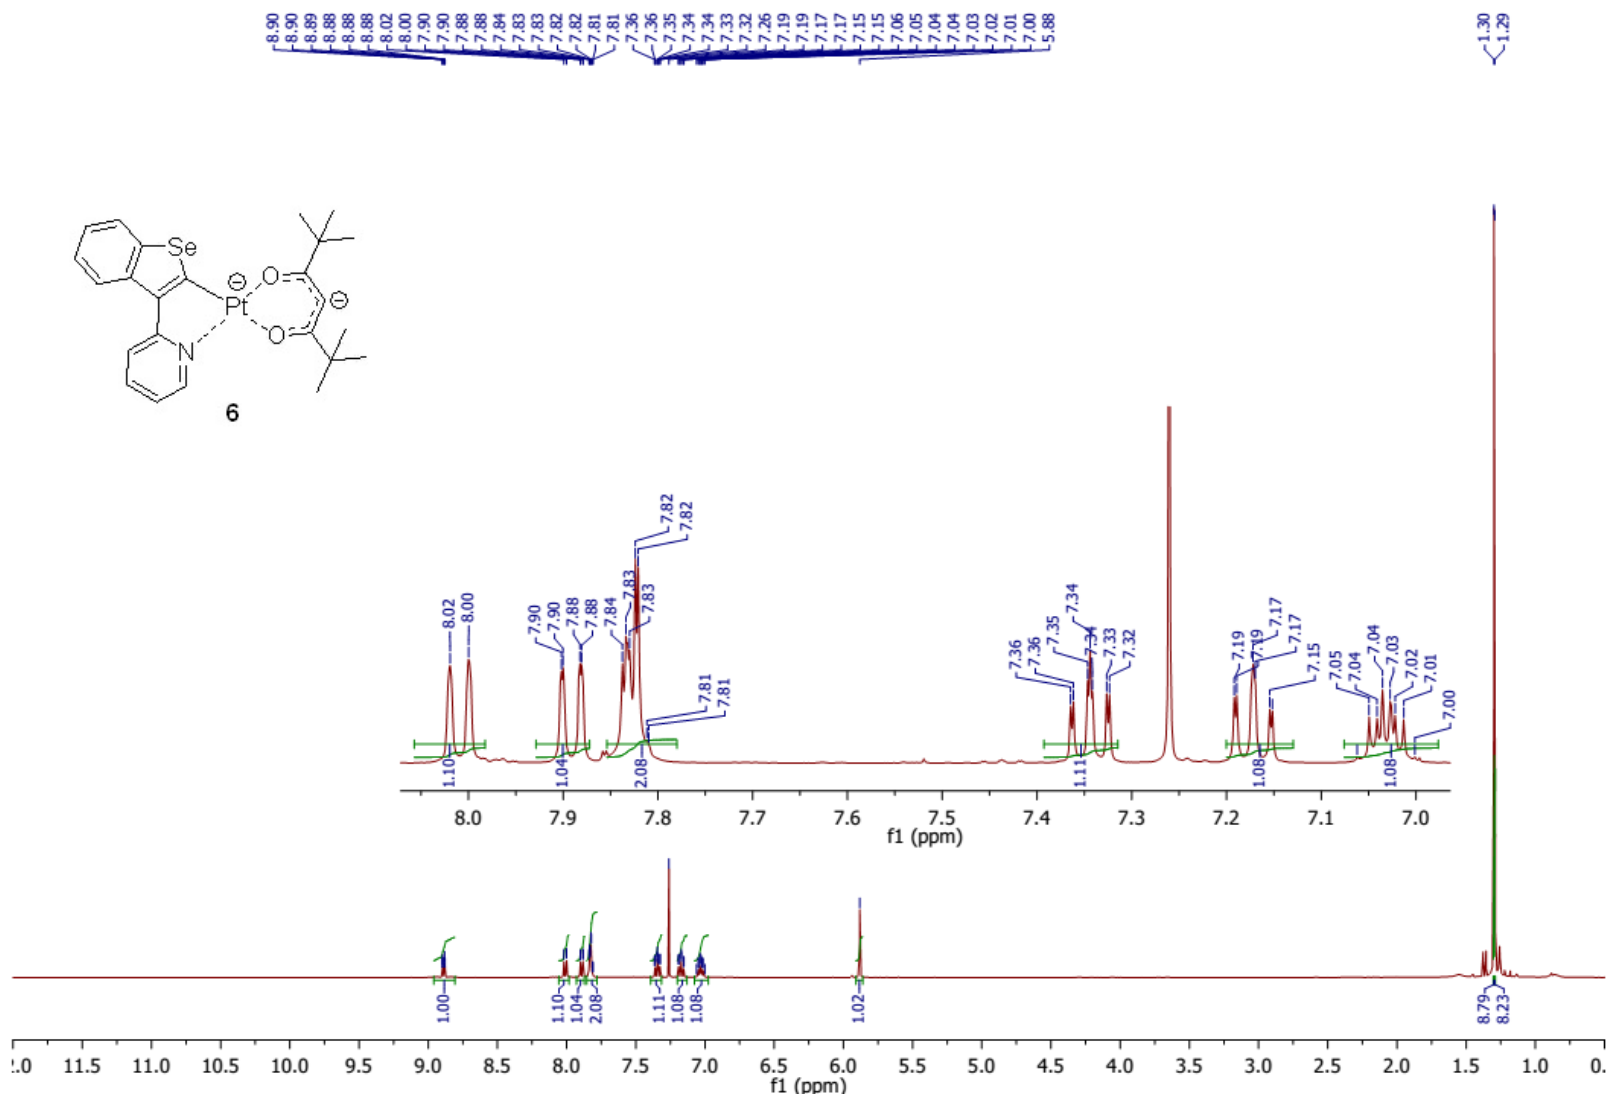



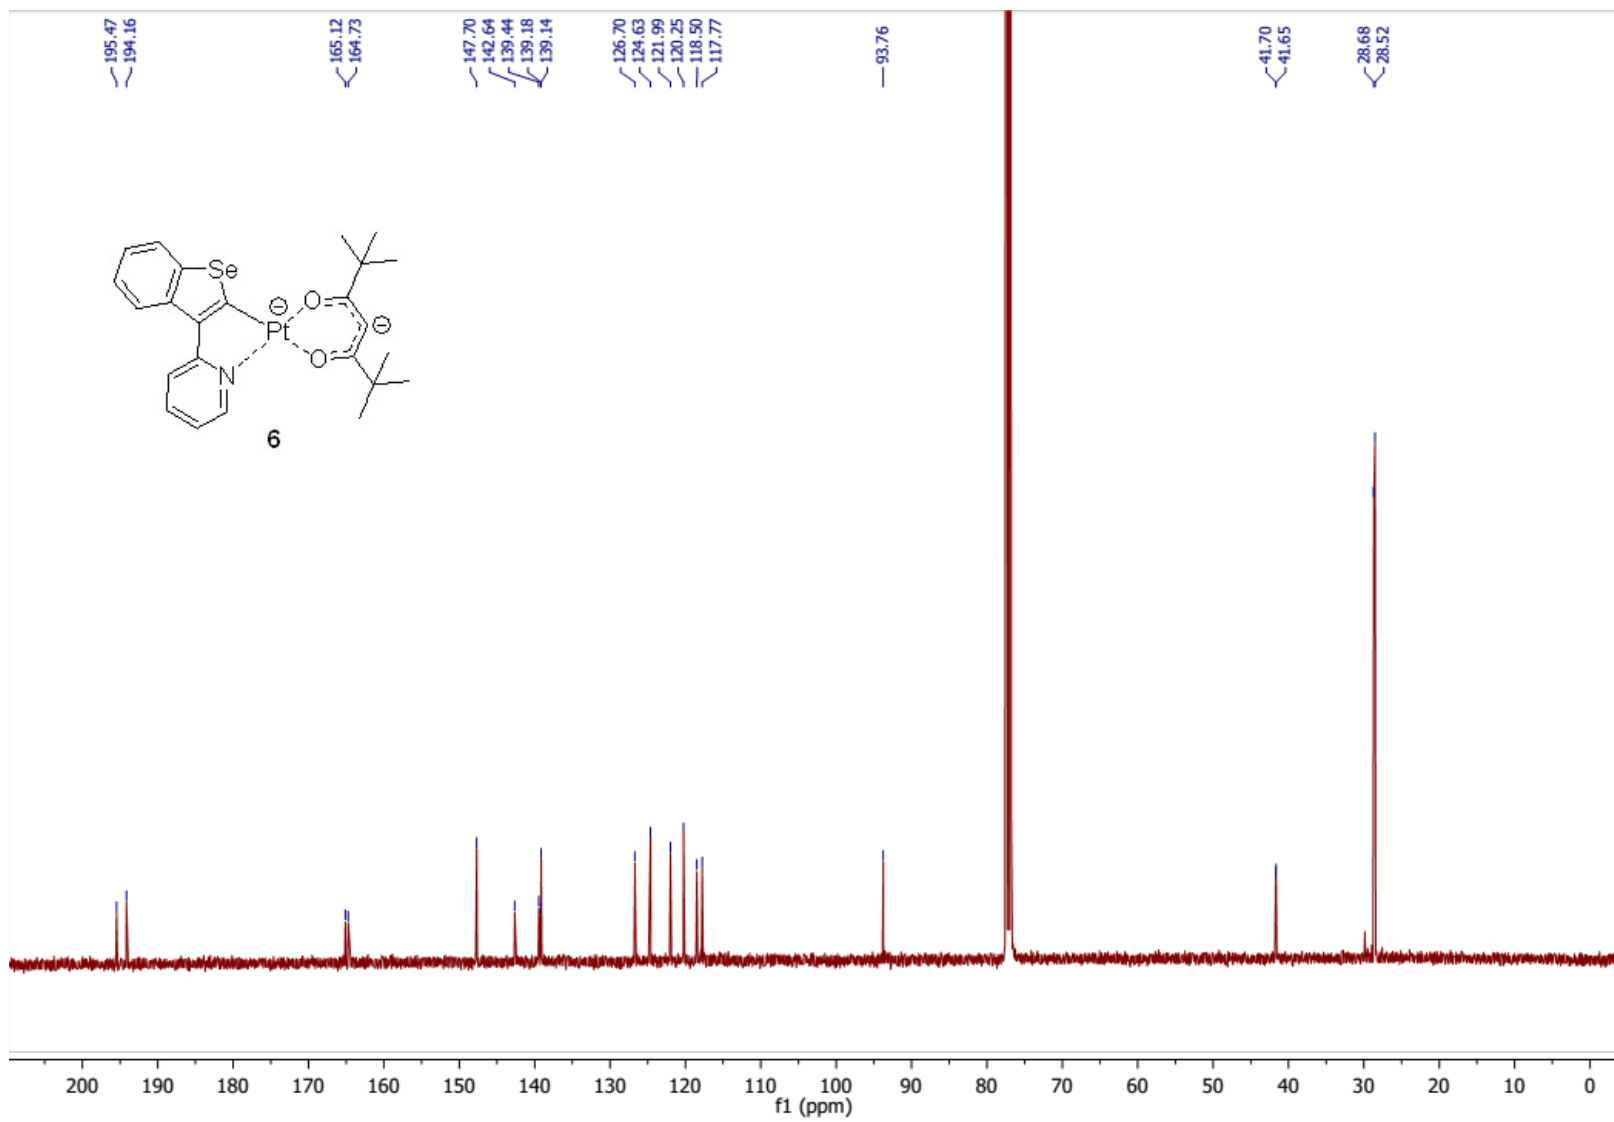

HRMS. Compound 6

HRMS\_2019\_05\_349 1317 (3.751) Cm (1317:1330-(1378:1390+1200:1210))

1: TOF MS ES+  
3.85e6

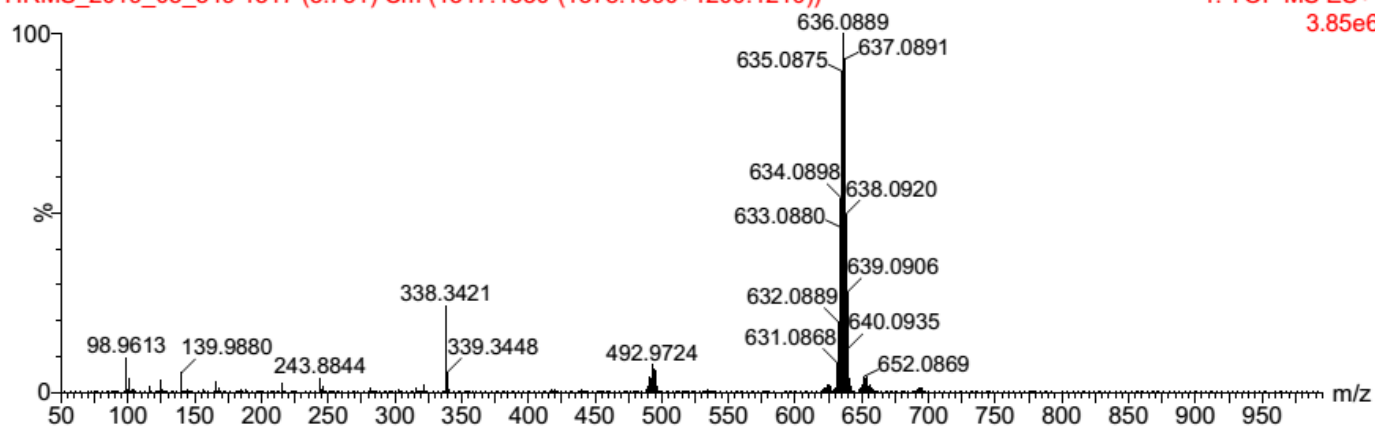

761 Petrenko A-561

HRMS\_2019\_05\_349 1317 (3.751) Cm (1317:1330-(1378:1390+1200:1210))

1: TOF MS ES+  
3.85e6

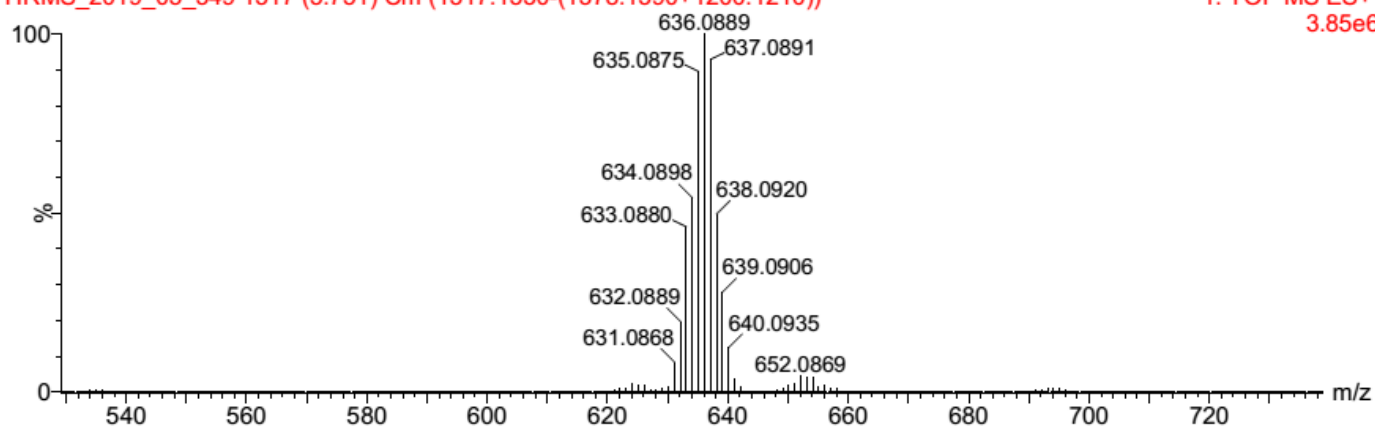

## Compound 3

**Table 1 Crystal data and structure refinement for A508.**

|                                       |                                                                              |
|---------------------------------------|------------------------------------------------------------------------------|
| Identification code                   | A-508                                                                        |
| Empirical formula                     | C <sub>24</sub> H <sub>27</sub> NO <sub>2</sub> PtSe                         |
| Formula weight                        | 635.52                                                                       |
| Temperature/K                         | 160.0(1)                                                                     |
| Crystal system                        | Monoclinic                                                                   |
| Space group                           | <i>P</i> 2 <sub>1</sub> / <i>c</i>                                           |
| <i>a</i> /Å                           | 17.13173(12)                                                                 |
| <i>b</i> /Å                           | 5.77152(5)                                                                   |
| <i>c</i> /Å                           | 23.0206(2)                                                                   |
| $\alpha$ /°                           | 90                                                                           |
| $\beta$ /°                            | 107.0499(8)                                                                  |
| $\gamma$ /°                           | 90                                                                           |
| Volume/Å <sup>3</sup>                 | 2176.15(3)                                                                   |
| <i>Z</i>                              | 4                                                                            |
| $\rho_{\text{calc}}$ /cm <sup>3</sup> | 1.9397                                                                       |
| $\mu$ /mm <sup>-1</sup>               | 14.126                                                                       |
| <i>F</i> (000)                        | 1206.1                                                                       |
| Crystal size/mm <sup>3</sup>          | 0.01 × 0.02 × 0.10                                                           |
| Radiation                             | Cu K $\alpha$ ( $\lambda$ = 1.54184)                                         |
| 2 $\theta$ max. for data collection/° | 155.0                                                                        |
| Index ranges                          | -18 ≤ <i>h</i> ≤ 21, -7 ≤ <i>k</i> ≤ 7, -28 ≤ <i>l</i> ≤ 29                  |
| Reflections collected                 | 25259                                                                        |
| Independent reflections               | 4609 [ <i>R</i> <sub>int</sub> = 0.0396, <i>R</i> <sub>sigma</sub> = 0.0203] |

Data/restraints/parameters 4609/0/268

Goodness-of-fit on  $F^2$  1.051

Final  $R$  indexes [ $I \geq 2\sigma(I)$ ]  $R_1 = 0.0354$ ,  $wR_2 = 0.0779$

Final  $R$  indexes [all data]  $R_1 = 0.0391$ ,  $wR_2 = 0.0786$

Largest diff. peak/hole /  $e \text{ \AA}^{-3}$  3.19/-1.39

**Table 2 Fractional Atomic Coordinates ( $\times 10^4$ ) and Equivalent Isotropic Displacement Parameters ( $\text{\AA}^2 \times 10^3$ ) for A508.  $U_{\text{eq}}$  is defined as 1/3 of the trace of the orthogonalised  $U_{ij}$  tensor.**

| Atom | x          | y          | z           | $U(\text{eq})$ |
|------|------------|------------|-------------|----------------|
| Pt1  | 2098.92(7) | 3302.4(2)  | 2708.95(5)  | 17.25(7)       |
| Se1  | 727.9(2)   | -2800.7(7) | 3244.91(17) | 22.50(10)      |
| O20  | 2790.1(13) | 5100(4)    | 3427.9(10)  | 20.4(4)        |
| O16  | 2572.2(13) | 5145(4)    | 2118.0(10)  | 21.4(5)        |
| N11  | 1443.0(16) | 1307(5)    | 2025.5(13)  | 19.4(5)        |
| C15  | 655(2)     | -2184(7)   | 1761.7(17)  | 23.7(7)        |
| C12  | 1335(2)    | 1732(6)    | 1432.8(16)  | 21.8(7)        |
| C3   | 1596.2(18) | 1180(6)    | 3179.8(15)  | 18.5(6)        |
| C10  | 1096.5(17) | -606(6)    | 2193.8(15)  | 19.1(6)        |
| C19  | 3347(2)    | 6546(5)    | 3402.7(17)  | 20.6(7)        |
| C4   | 1877(2)    | 2674(7)    | 4269.7(16)  | 23.9(7)        |
| C8   | 1142.1(19) | -900(6)    | 3928.7(15)  | 22.1(6)        |
| C21  | 3486(2)    | 7523(6)    | 1774.2(15)  | 21.6(6)        |
| C2   | 1196.1(18) | -624(6)    | 2834.1(15)  | 20.5(6)        |
| C14  | 544(2)     | -1744(6)   | 1152.1(19)  | 24.9(8)        |
| C13  | 883(2)     | 255(7)     | 986.2(15)   | 26.1(7)        |

|     |            |          |            |         |
|-----|------------|----------|------------|---------|
| C22 | 3861(2)    | 7534(7)  | 4019.0(15) | 23.1(7) |
| C17 | 3161(2)    | 6567(6)  | 2283.0(16) | 20.1(7) |
| C7  | 1051(2)    | -1259(7) | 4502.4(17) | 25.8(7) |
| C9  | 1560.4(18) | 1065(7)  | 3797.8(15) | 21.3(6) |
| C23 | 3519(2)    | 10184(6) | 1797.1(18) | 28.0(7) |
| C5  | 1783(2)    | 2307(8)  | 4836.8(16) | 28.0(7) |
| C26 | 4731(2)    | 6581(7)  | 4149.6(19) | 29.5(8) |
| C28 | 3881(2)    | 10192(7) | 3991.9(17) | 28.9(7) |
| C6  | 1374(2)    | 329(7)   | 4955.1(16) | 29.2(8) |
| C27 | 3515(2)    | 6847(7)  | 4534.9(17) | 29.1(8) |
| C24 | 4355(2)    | 6584(7)  | 1869(2)    | 31.1(9) |
| C18 | 3537(2)    | 7244(7)  | 2883.9(16) | 27.0(7) |
| C25 | 2941(3)    | 6781(7)  | 1151.5(18) | 30.8(8) |

**Table 3 Anisotropic Displacement Parameters ( $\text{\AA}^2 \times 10^3$ ) for A508. The Anisotropic displacement factor exponent takes the form:  $-2\pi^2[h^2a^*U_{11}+2hka^*b^*U_{12}+\dots]$ .**

| Atom | $U_{11}$  | $U_{22}$  | $U_{33}$  | $U_{12}$  | $U_{13}$ | $U_{23}$ |
|------|-----------|-----------|-----------|-----------|----------|----------|
| Pt1  | 14.93(10) | 17.76(11) | 18.97(10) | -2.46(4)  | 4.83(6)  | -0.40(4) |
| Se1  | 21.67(18) | 19.01(18) | 27.79(19) | -4.12(13) | 8.76(14) | 0.93(14) |
| O20  | 19.9(10)  | 18.9(12)  | 21.9(11)  | -4.6(9)   | 5.5(8)   | -2.4(9)  |
| O16  | 20.6(10)  | 22.4(12)  | 20.8(10)  | -6.2(9)   | 5.6(9)   | 1.7(9)   |
| N11  | 15.5(12)  | 22.1(14)  | 20.5(13)  | -1.5(10)  | 5.4(10)  | -2.0(11) |
| C15  | 19.1(15)  | 21.9(16)  | 29.7(17)  | -1.0(13)  | 6.5(13)  | -5.9(14) |
| C12  | 16.9(15)  | 30(2)     | 17.8(16)  | -1.7(12)  | 3.3(12)  | -0.6(12) |
| C3   | 16.2(13)  | 15.6(14)  | 23.7(16)  | 1.4(12)   | 5.9(11)  | 2.1(13)  |
| C10  | 12.3(12)  | 18.7(15)  | 25.0(15)  | 0.1(12)   | 3.4(11)  | -0.3(12) |

|     |          |          |          |           |          |          |
|-----|----------|----------|----------|-----------|----------|----------|
| C19 | 17.2(15) | 17.5(17) | 26.1(17) | -1.1(11)  | 4.6(13)  | -2.9(12) |
| C4  | 22.8(15) | 23.4(17) | 25.3(17) | -3.2(14)  | 6.5(13)  | 0.8(14)  |
| C8  | 19.0(14) | 21.7(17) | 25.4(16) | 0.6(13)   | 6.0(12)  | 3.2(13)  |
| C21 | 21.9(15) | 20.2(17) | 23.8(16) | -0.6(14)  | 8.6(12)  | 1.2(14)  |
| C2  | 15.1(13) | 20.4(16) | 26.6(16) | -2.5(12)  | 7.0(11)  | 0.6(13)  |
| C14 | 21.0(16) | 22.8(19) | 29.1(19) | -1.8(12)  | 4.5(14)  | -6.4(13) |
| C13 | 22.2(15) | 35(2)    | 21.3(15) | -3.0(14)  | 6.2(12)  | -4.6(14) |
| C22 | 19.1(15) | 28.3(19) | 20.8(15) | -3.2(14)  | 4.1(12)  | -2.0(14) |
| C17 | 17.1(16) | 21.8(18) | 23.2(17) | -1.4(11)  | 8.7(12)  | 2.7(12)  |
| C7  | 23.8(16) | 26.3(17) | 27.8(17) | -2.0(14)  | 8.0(13)  | 5.9(15)  |
| C9  | 15.4(13) | 24.6(17) | 24.3(16) | -0.1(13)  | 6.5(12)  | 4.0(14)  |
| C23 | 28.0(16) | 21.1(17) | 36.3(19) | -1.8(14)  | 11.4(14) | 3.7(15)  |
| C5  | 28.1(17) | 33(2)    | 21.1(16) | -2.7(16)  | 4.0(13)  | -2.7(15) |
| C26 | 21.3(17) | 33(2)    | 30.7(19) | 1.2(13)   | 1.9(15)  | -2.9(14) |
| C28 | 29.8(17) | 23.5(18) | 31.2(18) | -3.1(14)  | 5.3(14)  | -3.9(15) |
| C6  | 26.4(16) | 41(2)    | 21.0(15) | 2.6(15)   | 7.9(13)  | 6.8(15)  |
| C27 | 29.1(18) | 37(2)    | 20.7(17) | -6.9(14)  | 6.5(15)  | -3.5(14) |
| C24 | 28.8(19) | 31(2)    | 38(2)    | 3.1(14)   | 17.4(17) | 3.6(15)  |
| C18 | 25.4(16) | 29.3(18) | 25.8(17) | -11.7(15) | 6.8(13)  | -2.7(15) |
| C25 | 34(2)    | 33(2)    | 27.2(19) | -8.9(14)  | 11.6(16) | 1.6(14)  |

**Table 4 Bond Lengths for A508.**

| Atom | Atom | Length/Å | Atom | Atom | Length/Å |
|------|------|----------|------|------|----------|
| Pt1  | O20  | 2.017(2) | C19  | C18  | 1.387(5) |
| Pt1  | O16  | 2.070(2) | C4   | C9   | 1.411(5) |

|     |     |          |     |     |          |
|-----|-----|----------|-----|-----|----------|
| Pt1 | N11 | 2.007(3) | C4  | C5  | 1.378(5) |
| Pt1 | C3  | 1.991(3) | C8  | C7  | 1.390(5) |
| Se1 | C8  | 1.879(4) | C8  | C9  | 1.420(5) |
| Se1 | C2  | 1.887(3) | C21 | C17 | 1.540(5) |
| O20 | C19 | 1.281(4) | C21 | C23 | 1.537(5) |
| O16 | C17 | 1.269(4) | C21 | C24 | 1.538(5) |
| N11 | C12 | 1.345(5) | C21 | C25 | 1.525(5) |
| N11 | C10 | 1.362(4) | C14 | C13 | 1.394(5) |
| C15 | C10 | 1.396(5) | C22 | C26 | 1.535(5) |
| C15 | C14 | 1.383(6) | C22 | C28 | 1.536(5) |
| C12 | C13 | 1.384(5) | C22 | C27 | 1.527(5) |
| C3  | C2  | 1.366(5) | C17 | C18 | 1.400(5) |
| C3  | C9  | 1.443(4) | C7  | C6  | 1.376(6) |
| C10 | C2  | 1.433(5) | C5  | C6  | 1.408(6) |
| C19 | C22 | 1.543(5) |     |     |          |

**Table 5 Bond Angles for A508.**

| Atom | Atom | Atom | Angle/°    | Atom | Atom | Atom | Angle/°  |
|------|------|------|------------|------|------|------|----------|
| O16  | Pt1  | O20  | 91.50(9)   | C23  | C21  | C17  | 110.5(3) |
| N11  | Pt1  | O20  | 175.94(10) | C24  | C21  | C17  | 108.5(3) |
| N11  | Pt1  | O16  | 90.97(10)  | C24  | C21  | C23  | 108.8(3) |
| C3   | Pt1  | O20  | 96.51(11)  | C25  | C21  | C17  | 110.9(3) |
| C3   | Pt1  | O16  | 171.50(12) | C25  | C21  | C23  | 108.6(3) |
| C3   | Pt1  | N11  | 80.88(13)  | C25  | C21  | C24  | 109.5(3) |

|     |     |     |           |     |     |     |          |
|-----|-----|-----|-----------|-----|-----|-----|----------|
| C2  | Se1 | C8  | 85.38(15) | C3  | C2  | Se1 | 115.5(2) |
| C19 | O20 | Pt1 | 124.3(2)  | C10 | C2  | Se1 | 125.5(2) |
| C17 | O16 | Pt1 | 124.4(2)  | C10 | C2  | C3  | 118.8(3) |
| C12 | N11 | Pt1 | 124.7(2)  | C13 | C14 | C15 | 119.0(3) |
| C10 | N11 | Pt1 | 115.6(2)  | C14 | C13 | C12 | 119.6(3) |
| C10 | N11 | C12 | 119.6(3)  | C26 | C22 | C19 | 107.9(3) |
| C14 | C15 | C10 | 119.2(3)  | C28 | C22 | C19 | 110.2(3) |
| C13 | C12 | N11 | 121.5(3)  | C28 | C22 | C26 | 109.5(3) |
| C2  | C3  | Pt1 | 112.0(2)  | C27 | C22 | C19 | 111.9(3) |
| C9  | C3  | Pt1 | 135.7(3)  | C27 | C22 | C26 | 109.3(3) |
| C9  | C3  | C2  | 112.3(3)  | C27 | C22 | C28 | 108.0(3) |
| C15 | C10 | N11 | 121.1(3)  | C21 | C17 | O16 | 115.9(3) |
| C2  | C10 | N11 | 111.6(3)  | C18 | C17 | O16 | 124.8(3) |
| C2  | C10 | C15 | 127.2(3)  | C18 | C17 | C21 | 119.2(3) |
| C22 | C19 | O20 | 115.5(3)  | C6  | C7  | C8  | 119.2(3) |
| C18 | C19 | O20 | 126.5(3)  | C4  | C9  | C3  | 127.6(3) |
| C18 | C19 | C22 | 118.0(3)  | C8  | C9  | C3  | 114.6(3) |
| C5  | C4  | C9  | 120.2(3)  | C8  | C9  | C4  | 117.8(3) |
| C7  | C8  | Se1 | 126.1(3)  | C6  | C5  | C4  | 120.8(4) |
| C9  | C8  | Se1 | 112.2(2)  | C5  | C6  | C7  | 120.4(3) |
| C9  | C8  | C7  | 121.7(3)  | C17 | C18 | C19 | 127.9(3) |

**Table 6 Hydrogen Atom Coordinates ( $\text{\AA}\times 10^4$ ) and Isotropic Displacement Parameters ( $\text{\AA}^2\times 10^3$ ) for A508.**

| Atom | x | y | z | $U(\text{eq})$ |
|------|---|---|---|----------------|
|------|---|---|---|----------------|



|      |          |          |            |          |
|------|----------|----------|------------|----------|
| H15  | 438(2)   | -3514(7) | 1882.2(17) | 28.5(8)  |
| H12  | 1569(2)  | 3047(6)  | 1320.3(16) | 26.2(9)  |
| H4   | 2150(2)  | 3986(7)  | 4197.8(16) | 28.7(8)  |
| H14  | 248(2)   | -2767(6) | 857.2(19)  | 29.9(9)  |
| H13  | 805(2)   | 594(7)   | 578.3(15)  | 31.3(8)  |
| H7   | 775(2)   | -2557(7) | 4579.4(17) | 31.0(8)  |
| H23a | 2992(5)  | 10782(7) | 1785(14)   | 42.0(11) |
| H23b | 3914(13) | 10673(6) | 2166(6)    | 42.0(11) |
| H23c | 3673(18) | 10759(7) | 1455(7)    | 42.0(11) |
| H5   | 1992(2)  | 3379(8)  | 5144.9(16) | 33.6(9)  |
| H26a | 4715(3)  | 4919(7)  | 4135(15)   | 44.3(12) |
| H26b | 4972(7)  | 7150(50) | 3850(9)    | 44.3(12) |
| H26c | 5053(6)  | 7080(50) | 4546(6)    | 44.3(12) |
| H28a | 4136(17) | 10665(7) | 3691(10)   | 43.4(11) |
| H28b | 3334(2)  | 10784(7) | 3886(13)   | 43.4(11) |
| H28c | 4187(16) | 10790(7) | 4381(4)    | 43.4(11) |
| H6   | 1321(2)  | 94(7)    | 5341.5(16) | 35.1(9)  |
| H27a | 2970(8)  | 7440(50) | 4454(8)    | 43.6(12) |
| H27b | 3505(19) | 5189(7)  | 4565(10)   | 43.6(12) |
| H27c | 3853(12) | 7480(50) | 4910(3)    | 43.6(12) |
| H24a | 4704(5)  | 7110(50) | 2253(7)    | 46.6(13) |
| H24b | 4343(4)  | 4922(7)  | 1864(15)   | 46.6(13) |
| H24c | 4561(8)  | 7130(50) | 1548(9)    | 46.6(13) |
| H18  | 3966(2)  | 8289(7)  | 2942.4(16) | 32.3(9)  |
| H25a | 2912(17) | 5121(7)  | 1132(6)    | 46.3(13) |

|      |           |           |          |           |
|------|-----------|-----------|----------|-----------|
| H25b | 2403 (6)  | 7410 (50) | 1088 (7) | 46.3 (13) |
| H25c | 3165 (12) | 7350 (50) | 842 (2)  | 46.3 (13) |

## Compound 6

Table 1 Crystal data and structure refinement for A561new.

|                                                              |                                                                              |
|--------------------------------------------------------------|------------------------------------------------------------------------------|
| Identification code                                          | A-561                                                                        |
| Empirical formula                                            | C <sub>26</sub> H <sub>30</sub> N <sub>2</sub> O <sub>2</sub> PtSe           |
| Formula weight                                               | 676.57                                                                       |
| Temperature/K                                                | 150.0(1)                                                                     |
| Crystal system                                               | orthorhombic                                                                 |
| Space group                                                  | <i>Pnma</i>                                                                  |
| <i>a</i> /Å                                                  | 35.3302(2)                                                                   |
| <i>b</i> /Å                                                  | 6.8420(1)                                                                    |
| <i>c</i> /Å                                                  | 10.3388(1)                                                                   |
| $\alpha$ /°                                                  | 90                                                                           |
| $\beta$ /°                                                   | 90                                                                           |
| $\gamma$ /°                                                  | 90                                                                           |
| Volume/Å <sup>3</sup>                                        | 2499.15(3)                                                                   |
| <i>Z</i>                                                     | 4                                                                            |
| $\rho_{\text{calc}}$ /cm <sup>3</sup>                        | 1.798                                                                        |
| $\mu$ /mm <sup>-1</sup>                                      | 12.358                                                                       |
| <i>F</i> (000)                                               | 1312.0                                                                       |
| Crystal size/mm <sup>3</sup>                                 | 0.08 × 0.04 × 0.03                                                           |
| Radiation                                                    | CuK $\alpha$ ( $\lambda$ = 1.54184)                                          |
| 2 $\Theta$ max. for data collection/°                        | 155.0                                                                        |
| Index ranges                                                 | -43 ≤ <i>h</i> ≤ 44, -8 ≤ <i>k</i> ≤ 8, -11 ≤ <i>l</i> ≤ 13                  |
| Reflections collected                                        | 25004                                                                        |
| Independent reflections                                      | 2865 [ <i>R</i> <sub>int</sub> = 0.0648, <i>R</i> <sub>sigma</sub> = 0.0291] |
| Data/restraints/parameters                                   | 2865/0/187                                                                   |
| Goodness-of-fit on <i>F</i> <sup>2</sup>                     | 1.222                                                                        |
| Final <i>R</i> indexes [ <i>I</i> ≥ 2 $\sigma$ ( <i>I</i> )] | <i>R</i> <sub>1</sub> = 0.0339, <i>wR</i> <sub>2</sub> = 0.0927              |
| Final <i>R</i> indexes [all data]                            | <i>R</i> <sub>1</sub> = 0.0339, <i>wR</i> <sub>2</sub> = 0.0927              |
| Largest diff. peak/hole / e Å <sup>-3</sup>                  | 2.14/-2.14                                                                   |

Table 2 Fractional Atomic Coordinates ( $\times 10^4$ ) and Equivalent Isotropic Displacement Parameters ( $\text{\AA}^2 \times 10^3$ ) for A561new.  $U_{\text{eq}}$  is defined as 1/3 of the trace of the orthogonalised  $U_{ij}$  tensor.

| Atom | <i>x</i>   | <i>y</i> | <i>z</i>  | <i>U</i> (eq) |
|------|------------|----------|-----------|---------------|
| Pt1  | 5884.1(2)  | 7500     | 5932.3(2) | 14.62(11)     |
| Se1  | 5242.5(2)  | 7500     | 8443.7(5) | 24.58(16)     |
| C2   | 5386.5(15) | 7500     | 6700(5)   | 18.4(10)      |
| C3   | 5077.0(17) | 7500     | 5891(5)   | 17.2(11)      |
| C4   | 4342.2(17) | 7500     | 5983(5)   | 23.3(12)      |
| C5   | 4025.6(17) | 7500     | 6772(7)   | 26.1(12)      |
| C6   | 4060.0(17) | 7500     | 8108(7)   | 26.8(13)      |
| C7   | 4417.6(17) | 7500     | 8688(6)   | 26.0(11)      |
| C8   | 4732.0(16) | 7500     | 7885(6)   | 22.3(11)      |
| C9   | 4706.0(15) | 7500     | 6521(5)   | 18.8(10)      |
| C10  | 5184.0(14) | 7500     | 4529(5)   | 13.9(9)       |
| N11  | 5566.8(13) | 7500     | 4345(4)   | 15.5(8)       |
| C12  | 5711.1(15) | 7500     | 3130(5)   | 19.8(10)      |
| C13  | 5489.0(17) | 7500     | 2052(5)   | 23.3(11)      |
| C14  | 5100.5(17) | 7500     | 2215(6)   | 26.0(12)      |
| C15  | 4946.4(16) | 7500     | 3431(5)   | 22.2(11)      |
| C1'  | 7040.1(15) | 7500     | 4468(6)   | 20.7(10)      |
| C2'  | 6716.2(15) | 7500     | 5449(5)   | 17.8(10)      |
| C3'  | 6781.7(15) | 7500     | 6775(5)   | 19.0(10)      |
| C4'  | 6515.4(16) | 7500     | 7773(5)   | 18.6(10)      |
| C5'  | 6639.5(17) | 7500     | 9189(5)   | 19.7(11)      |
| O2'  | 6389.0(10) | 7500     | 4923(4)   | 21.9(8)       |
| O4'  | 6152.3(10) | 7500     | 7620(3)   | 19.2(7)       |
| C6'  | 7433.8(16) | 7500     | 5095(6)   | 27.2(12)      |
| C7'  | 6998.4(12) | 5664(7)  | 3620(4)   | 29.6(9)       |
| C8'  | 7066.1(18) | 7500     | 9392(7)   | 33.6(14)      |
| C9'  | 6468.9(14) | 5681(8)  | 9840(4)   | 39.2(11)      |
| C1S  | 6403(2)    | 2500     | 6593(8)   | 42.5(17)      |
| C2S  | 6804(2)    | 2500     | 6760(7)   | 33.5(14)      |
| N1S  | 7127.7(19) | 2500     | 6876(7)   | 45.8(15)      |

Table 3 Anisotropic Displacement Parameters ( $\text{\AA}^2 \times 10^3$ ) for A561new. The Anisotropic displacement factor exponent takes the form:

$$-2\pi^2[h^2a^*U_{11}+2hka^*b^*U_{12}+\dots].$$

| Atom | $U_{11}$  | $U_{22}$  | $U_{33}$  | $U_{23}$ | $U_{13}$ | $U_{12}$ |
|------|-----------|-----------|-----------|----------|----------|----------|
| Pt1  | 11.27(15) | 17.26(15) | 15.33(16) | 0        | -0.04(6) | 0        |
| Se1  | 18.3(3)   | 39.6(4)   | 15.8(3)   | 0        | 0.8(2)   | 0        |
| C2   | 17(2)     | 19(2)     | 19(2)     | 0        | 5.9(19)  | 0        |
| C3   | 15(3)     | 19(3)     | 18(3)     | 0        | 2.5(18)  | 0        |
| C4   | 15(3)     | 26(3)     | 28(3)     | 0        | 0.8(19)  | 0        |
| C5   | 16(2)     | 25(3)     | 37(3)     | 0        | 2(2)     | 0        |
| C6   | 18(2)     | 27(3)     | 36(3)     | 0        | 11(2)    | 0        |
| C7   | 23(3)     | 29(3)     | 27(3)     | 0        | 4(2)     | 0        |
| C8   | 20(3)     | 22(3)     | 24(3)     | 0        | 2(2)     | 0        |
| C9   | 16(2)     | 15(2)     | 25(3)     | 0        | 0.7(19)  | 0        |
| C10  | 12(2)     | 11(2)     | 18(2)     | 0        | 0.6(18)  | 0        |
| N11  | 15(2)     | 15(2)     | 16.5(18)  | 0        | 1.7(17)  | 0        |
| C12  | 17(2)     | 23(3)     | 19(2)     | 0        | 1(2)     | 0        |
| C13  | 30(3)     | 25(3)     | 15(2)     | 0        | 0(2)     | 0        |
| C14  | 26(3)     | 29(3)     | 23(3)     | 0        | -13(2)   | 0        |
| C15  | 15(2)     | 27(3)     | 24(3)     | 0        | -4(2)    | 0        |
| C1'  | 16(2)     | 24(3)     | 22(3)     | 0        | 4(2)     | 0        |
| C2'  | 16(2)     | 15(2)     | 22(3)     | 0        | -1(2)    | 0        |
| C3'  | 15(2)     | 21(2)     | 20(3)     | 0        | 0.6(19)  | 0        |
| C4'  | 20(2)     | 16(2)     | 20(2)     | 0        | 3(2)     | 0        |
| C5'  | 18(3)     | 23(3)     | 18(3)     | 0        | -0.1(18) | 0        |
| O2'  | 13.8(17)  | 35(2)     | 16.9(17)  | 0        | 1.5(14)  | 0        |
| O4'  | 14.9(16)  | 28.2(19)  | 14.6(16)  | 0        | 2.3(13)  | 0        |
| C6'  | 16(2)     | 36(3)     | 29(3)     | 0        | 4(2)     | 0        |
| C7'  | 26.1(19)  | 36(2)     | 26.4(19)  | -7.6(18) | 7.2(15)  | 0.1(18)  |
| C8'  | 24(3)     | 52(4)     | 25(3)     | 0        | -5(2)    | 0        |
| C9'  | 44(3)     | 49(3)     | 24.2(19)  | 13(2)    | -8.2(18) | -16(2)   |
| C1S  | 41(4)     | 35(3)     | 52(4)     | 0        | -17(3)   | 0        |
| C2S  | 46(4)     | 26(3)     | 29(3)     | 0        | -9(3)    | 0        |
| N1S  | 42(3)     | 41(3)     | 55(4)     | 0        | -14(3)   | 0        |

Table 4 Bond Lengths for A561new.

| Atom | Atom | Length/Å  | Atom | Atom             | Length/Å  |
|------|------|-----------|------|------------------|-----------|
| Pt1  | C2   | 1.929(5)  | C12  | C13              | 1.363(8)  |
| Pt1  | N11  | 1.987(5)  | C13  | C14              | 1.383(9)  |
| Pt1  | O2'  | 2.067(4)  | C14  | C15              | 1.370(9)  |
| Pt1  | O4'  | 1.985(4)  | C1'  | C2'              | 1.529(7)  |
| Se1  | C2   | 1.874(5)  | C1'  | C6'              | 1.535(8)  |
| Se1  | C8   | 1.894(6)  | C1'  | C7'              | 1.539(5)  |
| C2   | C3   | 1.376(8)  | C1'  | C7' <sup>1</sup> | 1.539(5)  |
| C3   | C9   | 1.463(7)  | C2'  | C3'              | 1.390(8)  |
| C3   | C10  | 1.458(7)  | C2'  | O2'              | 1.278(7)  |
| C4   | C5   | 1.384(8)  | C3'  | C4'              | 1.396(7)  |
| C4   | C9   | 1.400(8)  | C4'  | C5'              | 1.528(7)  |
| C5   | C6   | 1.387(10) | C4'  | O4'              | 1.292(7)  |
| C6   | C7   | 1.399(9)  | C5'  | C8'              | 1.522(8)  |
| C7   | C8   | 1.387(8)  | C5'  | C9' <sup>1</sup> | 1.538(6)  |
| C8   | C9   | 1.413(8)  | C5'  | C9'              | 1.538(6)  |
| C10  | N11  | 1.366(6)  | C1S  | C2S              | 1.429(11) |
| C10  | C15  | 1.412(7)  | C2S  | N1S              | 1.148(10) |
| N11  | C12  | 1.356(7)  |      |                  |           |

 $^1+X,3/2-Y,+Z$ 

Table 5 Bond Angles for A561new.

| Atom | Atom | Atom | Angle/°    | Atom | Atom | Atom             | Angle/°  |
|------|------|------|------------|------|------|------------------|----------|
| C2   | Pt1  | N11  | 79.9(2)    | C12  | N11  | C10              | 120.1(5) |
| C2   | Pt1  | O2'  | 173.95(19) | N11  | C12  | C13              | 122.8(5) |
| C2   | Pt1  | O4'  | 94.22(19)  | C12  | C13  | C14              | 118.1(5) |
| N11  | Pt1  | O2'  | 94.01(16)  | C15  | C14  | C13              | 120.4(5) |
| O4'  | Pt1  | N11  | 174.16(16) | C14  | C15  | C10              | 120.1(5) |
| O4'  | Pt1  | O2'  | 91.83(15)  | C2'  | C1'  | C6'              | 113.4(5) |
| C2   | Se1  | C8   | 88.0(2)    | C2'  | C1'  | C7' <sup>1</sup> | 107.8(3) |
| Se1  | C2   | Pt1  | 130.0(3)   | C2'  | C1'  | C7'              | 107.8(3) |
| C3   | C2   | Pt1  | 118.3(4)   | C6'  | C1'  | C7' <sup>1</sup> | 109.1(3) |
| C3   | C2   | Se1  | 111.6(4)   | C6'  | C1'  | C7'              | 109.1(3) |
| C2   | C3   | C9   | 116.2(5)   | C7'  | C1'  | C7' <sup>1</sup> | 109.4(5) |
| C2   | C3   | C10  | 112.4(5)   | C3'  | C2'  | C1'              | 122.0(5) |
| C10  | C3   | C9   | 131.4(5)   | O2'  | C2'  | C1'              | 113.2(5) |
| C5   | C4   | C9   | 120.5(5)   | O2'  | C2'  | C3'              | 124.8(5) |
| C4   | C5   | C6   | 121.1(6)   | C2'  | C3'  | C4'              | 128.0(5) |

|     |     |     |          |     |     |                 |          |
|-----|-----|-----|----------|-----|-----|-----------------|----------|
| C5  | C6  | C7  | 120.4(5) | C3' | C4' | C5'             | 121.0(5) |
| C8  | C7  | C6  | 117.8(6) | O4' | C4' | C3'             | 125.4(5) |
| C7  | C8  | Se1 | 125.4(5) | O4' | C4' | C5'             | 113.7(5) |
| C7  | C8  | C9  | 123.1(5) | C4' | C5' | C9'             | 107.9(3) |
| C9  | C8  | Se1 | 111.5(4) | C4' | C5' | C9 <sup>1</sup> | 107.9(3) |
| C4  | C9  | C3  | 130.2(5) | C8' | C5' | C4'             | 114.6(5) |
| C4  | C9  | C8  | 117.1(5) | C8' | C5' | C9 <sup>1</sup> | 109.1(3) |
| C8  | C9  | C3  | 112.7(5) | C8' | C5' | C9'             | 109.1(3) |
| N11 | C10 | C3  | 113.0(5) | C9' | C5' | C9 <sup>1</sup> | 108.0(5) |
| N11 | C10 | C15 | 118.5(5) | C2' | O2' | Pt1             | 124.5(3) |
| C15 | C10 | C3  | 128.5(5) | C4' | O4' | Pt1             | 125.5(3) |
| C10 | N11 | Pt1 | 116.3(4) | N1S | C2S | C1S             | 179.0(8) |
| C12 | N11 | Pt1 | 123.6(4) |     |     |                 |          |

<sup>1</sup>+X,3/2-Y,+Z

Table 6 Hydrogen Atom Coordinates ( $\text{\AA}\times 10^4$ ) and Isotropic Displacement Parameters ( $\text{\AA}^2\times 10^3$ ) for A561new.

| Atom | X       | y       | z        | U(eq) |
|------|---------|---------|----------|-------|
| H4   | 4313.12 | 7500    | 5088.93  | 28    |
| H5   | 3785.96 | 7500    | 6399.45  | 31    |
| H6   | 3843.88 | 7500    | 8621.68  | 32    |
| H7   | 4443.8  | 7500    | 9583.51  | 31    |
| H12  | 5972.61 | 7500    | 3027.04  | 24    |
| H13  | 5595.69 | 7500    | 1229.55  | 28    |
| H14  | 4942.84 | 7500    | 1494.92  | 31    |
| H15  | 4684.84 | 7500    | 3533.91  | 27    |
| H3'  | 7034.23 | 7500    | 7028.57  | 23    |
| H6'A | 7624.12 | 7500    | 4432.7   | 41    |
| H6'B | 7461.62 | 8645.6  | 5622.7   | 41    |
| H7'A | 7198.96 | 5630.35 | 2993.67  | 44    |
| H7'B | 7011.26 | 4519.31 | 4154.34  | 44    |
| H7'C | 6758.86 | 5698.73 | 3181.67  | 44    |
| H8'A | 7121.29 | 7500    | 10301.18 | 50    |
| H8'B | 7173.09 | 8645.6  | 9000.07  | 50    |
| H9'A | 6199.72 | 5674.33 | 9714.43  | 59    |
| H9'B | 6576.56 | 4525.97 | 9462.82  | 59    |
| H9'C | 6524.05 | 5708.86 | 10748.97 | 59    |
| H1SA | 6280.79 | 2500    | 7391.39  | 64    |
| H1SB | 6335.19 | 1354.4  | 6091.39  | 64    |

## Computational details

The structures of the **3** and **6** complexes in the ground electronic state were optimized at the DFT level in a gas phase using the B3LYP<sup>1</sup> hybrid functional and combined basis set – Lanl2DZ<sup>2</sup> for the Pt atoms and 6-31G(d)<sup>3</sup> basis set for the rest of atoms (C, N, O, Se and H). The structure of both complexes in the first excited triplet state was optimized by the same method using spin-unrestricted SCF formalism. The vertical electronic singlet-singlet and singlet-triplet electronic transitions were then calculated by the time-dependent (TD) DFT method<sup>4</sup> using the same B3LYP/Lanl2DZ(Pt)/6-31G(d)(C,N,O,Se,H) approximation. In order to take into account the solvent effects vertical spectra were computed using the polarizable continuum model (PCM)<sup>5</sup>, taking the toluene ( $\epsilon = 2.37$ ) as a model solvent. All these calculations were performed using the Gaussian16 software [<https://gaussian.com/citation/>].

Based on the T<sub>1</sub> state optimized geometries from the previous step the spin-orbit coupling (SOC) effects were treated as a perturbation based on the scalar relativistic (SR) orbitals after SCF and TDDFT calculations (pSOC-TDDFT)<sup>6</sup>; B3LYP functional and Slater-type TZP all-electron basis set<sup>7</sup> were used for this sort of calculations. The SOC calculations for both studied systems were carried out using the ADF2018 package [[https://www.scm.com/doc/ADF/Required\\_citations.html](https://www.scm.com/doc/ADF/Required_citations.html)].

The SOC matrix elements,  $\langle S_i | \hat{H}_{SO} | T_j \rangle$  were calculated as root mean squares, i.e. as square root of the sum of squares of spin-orbit coupling matrix elements of all triplet state sublevels ( $m=0,\pm 1$ ) of the uncoupled states<sup>8</sup> [[10.1021/jacs.6b12124](https://doi.org/10.1021/jacs.6b12124)]:

$$\langle S_i | \hat{H}_{SO} | T_j \rangle = \sqrt{\sum_{m=0,\pm 1} \langle S_i | \hat{H}_{SO} | T_j^m \rangle^2}. \quad (1)$$

The spin-orbit coupling operator  $\hat{H}_{SO}$  was considered in our calculations within the zeroth-order regular approximation (ZORA) in accordance with the following expression:

$$\hat{H}_{SO} = \frac{c^2}{(2c^2 - V)^2} \boldsymbol{\sigma}(\nabla V \cdot \mathbf{p}), \quad (2)$$

where  $\boldsymbol{\sigma}$ – Pauli spin matrix vector,  $\mathbf{p}$  – the linear momentum operator;  $c$  – speed of light,  $V$ – Kohn–Sham potential. The radiative lifetimes ( $\tau$ ) for the singlet and triplet states of interest were estimated according to<sup>9,10</sup>:

$$\tau = \frac{c^3}{2(\Delta E^2)f}, \quad (3)$$

where  $\Delta E$  and  $f$  – the energy and intensity of the corresponding singlet-singlet or singlet-triplet transitions with accounting of SOC perturbations. For the triplet states the partial radiative lifetimes for each separate spin sublevel ( $\tau^m$ ,  $m=0,\pm 1$ ) were calculated.

Accounting for the quite large zero-field splitting (ZFS) of  $T_1^m$  sublevels for both LLT-30 and LLT-31 complexes due to the presence of heavy Pt and Se atoms the Boltzmann-weighted averaging procedure was used for the estimation of average phosphorescence lifetime ( $\tau_{av}$ )<sup>9,10</sup>:

$$\tau_{av} = \frac{1 + e^{[-\Delta E_{m=0}^{m=-1}/k_b T]} + e^{[-\Delta E_{m=1}^{m=-1}/k_b T]}}{k_{m=-1} + k_{m=0} e^{[-\Delta E_{m=0}^{m=-1}/k_b T]} + k_{m=1} e^{[-\Delta E_{m=1}^{m=-1}/k_b T]}}, \quad (4)$$

where  $\Delta E_{m=0}^{m=-1}$  and  $\Delta E_{m=1}^{m=-1}$  correspond to the energy difference between the triplet state spin-sublevels with  $m = -1, 0$  and with  $m = -1, 1$  respectively,  $k_{m=-1}$ ,  $k_{m=0}$  and  $k_{m=1}$  – decay rates for the individual spin-sublevels of the  $T_1$  state ( $k_m = 1/\tau^m$ ),  $k_b$  – Boltzmann constant,  $T$  – temperature (298 K which is the same as in experiment).

## Materials

Molybdenum trioxide ( $\text{MoO}_3$ ), N,N'-di(1-naphthyl)-N,N'-diphenyl-(1,1'-biphenyl)-4,4'-diamine (NPB), 1,3-bis(9-carbazolyl)benzene (mCP), diphenyl-4-triphenylsilyl-phenylphosphineoxide (TSPO1) and 2,2',2''-(1,3,5-benzinetriyl)-tris(1-phenyl-1-*H*-benzimidazole) (TPBi) were obtained from either Sigma Aldrich or Lumtec.

## Instrumentation

Cyclic voltammetry (CV) measurements were performed using a micro-Autolab III (Metrohm Autolab) potentiostat equipped with a standard three-electrode configuration. A three-electrode cell equipped with a glassy carbon-working electrode, an Ag/AgNO<sub>3</sub> (0.01 M in anhydrous acetonitrile) reference electrode and a Pt wire counter electrode were employed. The measurements were performed under argon atmosphere at 50 mV/s potential rate at room temperature. Oxidation potentials ( $E_{1/2}$  vs Fc) for quasi reversible oxidation were collected as average values of the anodic and cathodic peak potentials,  $E_{pa}$  and  $E_{pc}$ , respectively. Ionization potentials ( $I_p^{CV}$ ) were estimated from the onset oxidation potential using the relationship  $I_p^{CV} =$



4.8 + E<sub>ox</sub> vs Fc. Electron affinity ( $E_A$ ) values were obtained from the reduction potentials using the approximation  $E_A = 4.8 + E_{red}$  vs Fc.

Electron photoemission spectrometry was used to determine the ionization potentials (IP) of the layers of the synthesized compounds. For the recording of the photoelectron emission spectra, the layers were prepared by drop-casting chloroform solutions of the materials on cleaned indium tin oxide (ITO)-coated glass substrates. The negative voltage of 300 V was applied to the sample substrate. The deep UV deuterium light source ASBN-D130-CM and CM110 1/8 m monochromator were used for the illumination of the samples with the monochromatic light. A 6517B Keithley electrometer was connected to the counter-electrode for the measurement of the photocurrent which was flowing in the circuit under illumination. Energy scan of the incident photons was performed while increasing the photon energy. The photocurrent (which is attributed to  $dU/dt$ ) is dependent on the incident light photon energy ( $h\nu$ ). The  $I_p$  was estimated as the intersection points of the extrapolated linear part of the dependence  $(dU/dt)^{1/2} = f(h\nu)$  and the  $h\nu$  axis (i.e. the  $h\nu$  value at zero photocurrent) [1].

Emission and UV/Vis absorbance spectra of the compounds in solutions ( $10^{-5}$  M) and solid films were recorded using the Edinburgh Instruments FLS980 and Avantes spectrometers, respectively. The excitation wavelength of 350 nm were selected for recording PL spectra. Photoluminescence decay curves were taken exploiting the PicoQuant LDH-D-C-375 laser (wavelength 374 nm) as the excitation source. Photoluminescence quantum yields (PLQY) were measured using an integrated sphere (inner diameter of 120 mm) on Edinburgh Instruments FLS980 spectrometer. Electroluminescent devices were fabricated by spin-coating of light-emitting layers and by vacuum deposition of additional organic and metal layers onto pre-cleaned ITO coated glass substrates under vacuum higher than  $2 \times 10^{-6}$  mBar. ITO-coated glass substrates with a sheet resistance of 15  $\Omega$ /sq were pre-patterned getting seven independent devices with area 6 mm<sup>2</sup>. Density-voltage and luminance-voltage characteristics were recorded utilizing certificated photodiode PH100-Si-HA-D0 together with the PC-Based Power and Energy Monitor 11S-LINK (from STANDA) and Keithley 2400C source meter. Electroluminescence (EL) spectra were taken by the Avantes AvaSpec-2048XL spectrometer. Device efficiencies were calculated using the luminance, current density, and EL spectra.

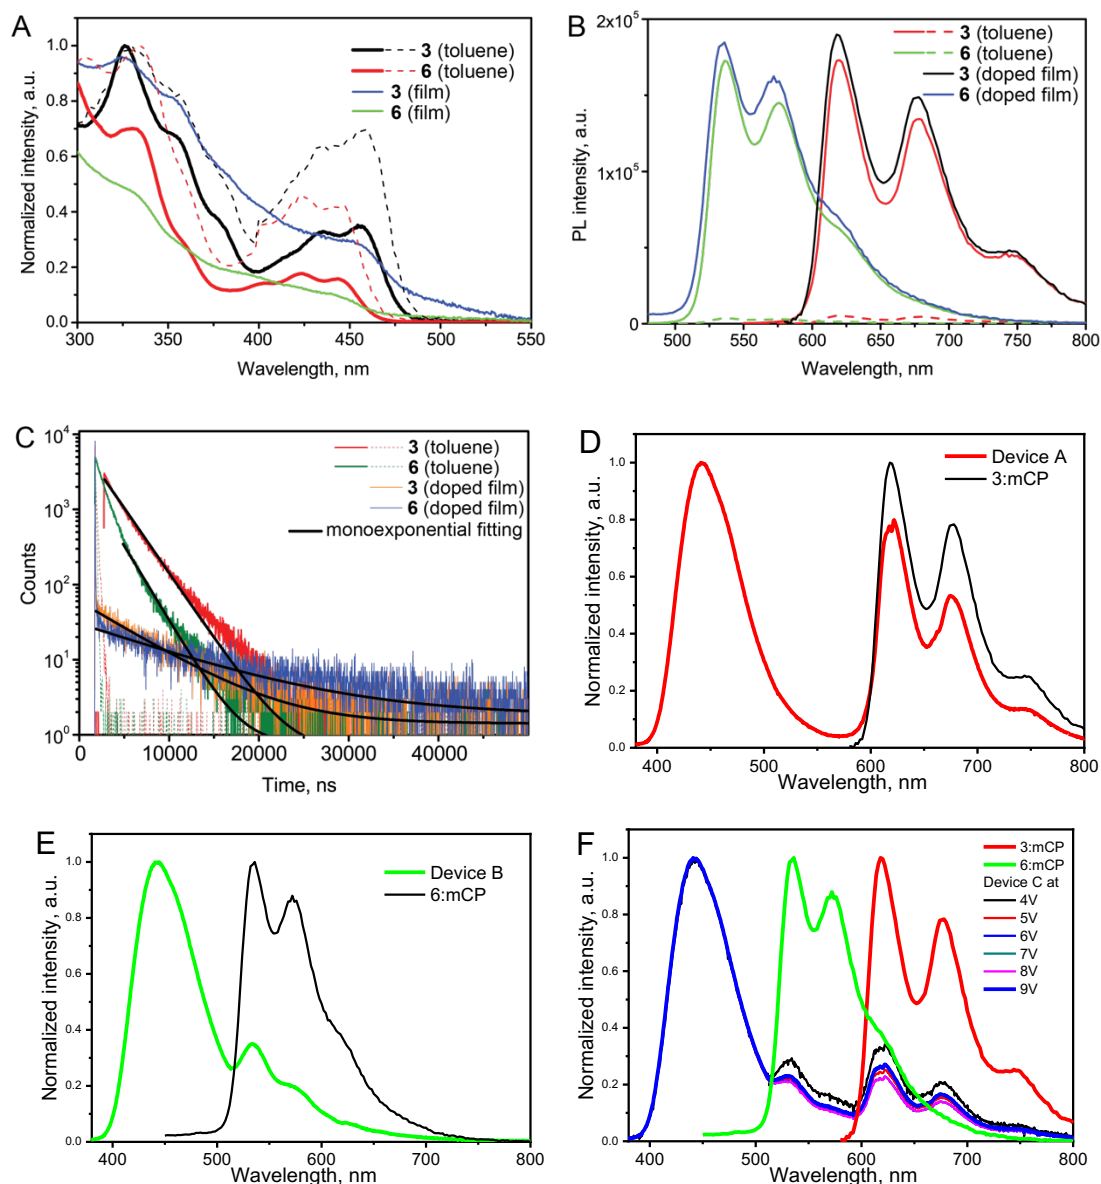

**Figure S1.** Absorption (solid lines) and excitation spectra (dashed lines) (a); phosphorescence spectra (b); and phosphorescence decays (c) of deoxygenated (solid lines) and non-deoxygenated (dashed lines) toluene solutions and solid films of complexes **3** and **6**. Doped films were spin-coated using mCP as the host with a 0.5wt.% of the dopant. EL spectra of devices A (d), B (e), C (f) and PL spectra of corresponding doped films of 3:mCP and/or 6:mCP.

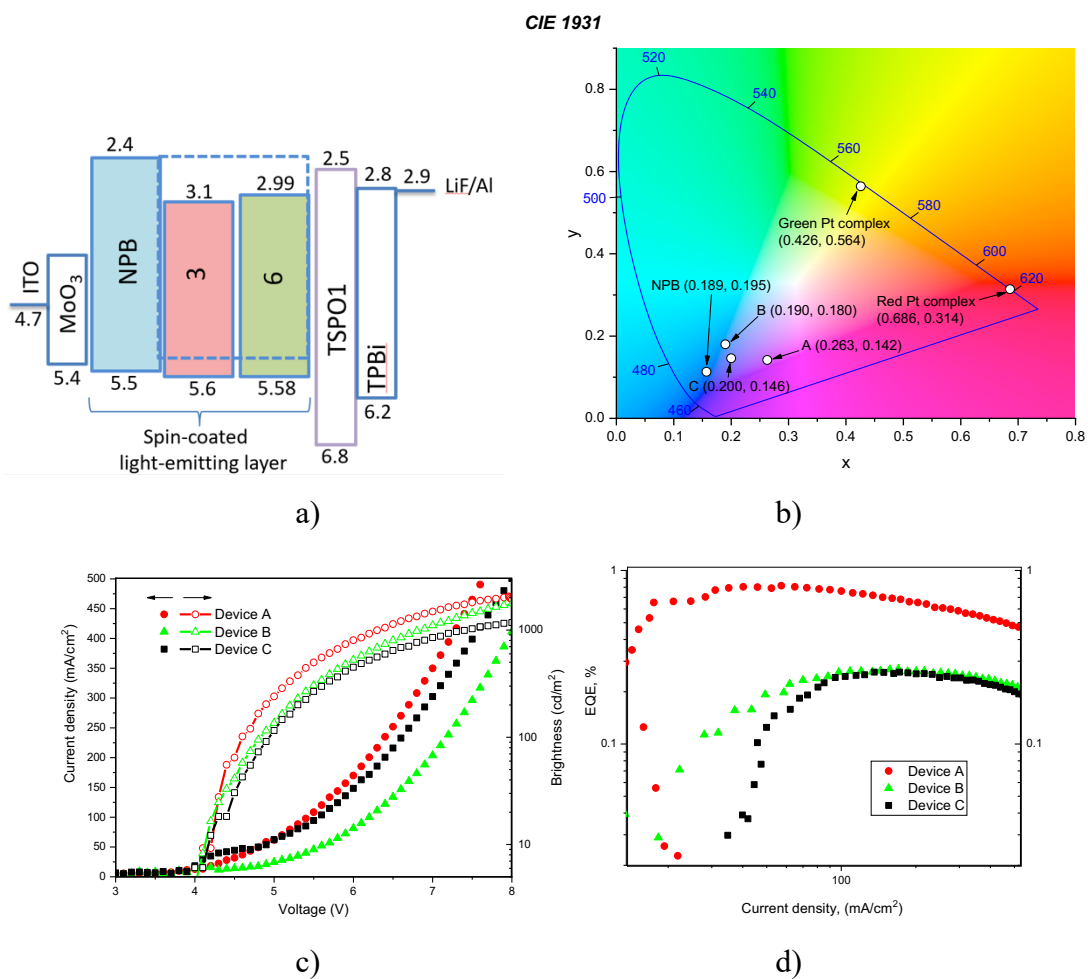

Figure S2. Equilibrium energy diagram (a); CIE 1931 coordinates for emission of designed emitters **3**, **6** and fabricated devices A-D (b); current density and brightness versus voltage (c); and external quantum efficiency versus current density (cd) characteristics.

**Table SX.** Cartesian coordinates for the **3** complex in the ground electronic state optimized by the B3LYP/Lan12DZ(Pt)/6-31G(d)(C,N,O,Se,H) method.

|    |              |              |              |
|----|--------------|--------------|--------------|
| 8  | -1.092127000 | 1.509884000  | 0.000243000  |
| 6  | -2.358029000 | 1.733130000  | 0.000320000  |
| 6  | -3.381321000 | 0.773743000  | -0.000042000 |
| 6  | -3.253512000 | -0.626252000 | -0.000207000 |
| 8  | -2.145905000 | -1.255693000 | 0.000089000  |
| 6  | -4.534019000 | -1.496428000 | -0.000771000 |
| 6  | -2.776934000 | 3.226901000  | 0.000769000  |
| 6  | -3.616108000 | 3.523691000  | -1.265196000 |
| 6  | -3.615796000 | 3.522963000  | 1.267133000  |
| 6  | -1.552041000 | 4.155840000  | 0.000890000  |
| 6  | -5.367077000 | -1.185130000 | -1.266205000 |
| 6  | -4.170512000 | -2.991699000 | -0.000899000 |
| 6  | -5.367945000 | -1.185564000 | 1.264198000  |
| 1  | -4.391294000 | 1.160042000  | -0.000173000 |
| 1  | -3.890390000 | 4.585358000  | -1.286736000 |
| 1  | -3.045981000 | 3.304063000  | -2.175017000 |
| 1  | -4.540674000 | 2.939338000  | -1.298017000 |
| 1  | -3.890132000 | 4.584602000  | 1.289325000  |
| 1  | -4.540304000 | 2.938524000  | 1.299888000  |
| 1  | -3.045399000 | 3.302876000  | 2.176674000  |
| 1  | -1.888981000 | 5.199068000  | 0.001186000  |
| 1  | -0.929808000 | 4.000769000  | 0.886954000  |
| 1  | -0.930016000 | 4.001240000  | -0.885410000 |
| 1  | -6.261604000 | -1.819410000 | -1.288614000 |
| 1  | -5.696467000 | -0.141900000 | -1.297187000 |
| 1  | -4.789883000 | -1.382876000 | -2.176680000 |
| 1  | -5.087458000 | -3.592419000 | -0.001359000 |
| 1  | -3.586484000 | -3.261268000 | -0.886440000 |
| 1  | -3.587161000 | -3.261581000 | 0.884991000  |
| 1  | -6.262488000 | -1.819850000 | 1.285775000  |
| 1  | -4.791378000 | -1.383625000 | 2.175003000  |
| 1  | -5.697363000 | -0.142347000 | 1.295317000  |
| 78 | -0.219102000 | -0.358458000 | 0.000079000  |
| 6  | 1.710678000  | 0.208345000  | -0.000046000 |
| 7  | 0.661870000  | -2.193798000 | 0.000190000  |
| 6  | 2.403824000  | 1.478583000  | -0.000355000 |
| 6  | 3.822993000  | 1.386598000  | -0.000338000 |
| 34 | 4.420188000  | -0.408981000 | 0.000022000  |
| 6  | 2.577142000  | -0.865890000 | 0.000109000  |
| 6  | 2.032989000  | -2.190438000 | 0.000287000  |
| 6  | 2.731153000  | -3.407943000 | 0.000552000  |
| 6  | 2.028675000  | -4.604800000 | 0.000677000  |
| 6  | 0.629515000  | -4.582579000 | 0.000534000  |
| 6  | -0.017200000 | -3.353644000 | 0.000293000  |
| 6  | 4.634464000  | 2.522276000  | -0.000612000 |
| 6  | 4.031357000  | 3.777063000  | -0.000922000 |
| 6  | 2.631424000  | 3.894495000  | -0.000972000 |
| 6  | 1.827193000  | 2.762889000  | -0.000697000 |
| 1  | 3.816084000  | -3.396667000 | 0.000660000  |
| 1  | 2.564065000  | -5.549988000 | 0.000891000  |
| 1  | 0.046106000  | -5.496557000 | 0.000605000  |
| 1  | -1.096055000 | -3.256323000 | 0.000180000  |
| 1  | 5.716931000  | 2.432200000  | -0.000596000 |
| 1  | 4.651715000  | 4.669460000  | -0.001137000 |
| 1  | 2.174369000  | 4.880486000  | -0.001231000 |
| 1  | 0.749286000  | 2.838055000  | -0.000741000 |

**Table SX.** Cartesian coordinates for the **6** complex in the ground electronic state optimized by the B3LYP/Lan12DZ(Pt)/6-31G(d)(C,N,O,Se,H) method.

|    |              |              |              |
|----|--------------|--------------|--------------|
| 78 | 0.293129000  | 0.387971000  | -0.000107000 |
| 6  | -1.547077000 | -0.266690000 | -0.000034000 |
| 7  | -0.729679000 | 2.142665000  | -0.000014000 |
| 34 | -2.174969000 | -2.029491000 | -0.000057000 |
| 6  | -3.933956000 | -1.313354000 | 0.000063000  |
| 6  | -2.578194000 | 0.663580000  | 0.000027000  |
| 6  | -2.104946000 | 2.037354000  | 0.000014000  |
| 6  | -2.857247000 | 3.224598000  | -0.000006000 |
| 6  | -2.225290000 | 4.461351000  | -0.000013000 |
| 6  | -0.829850000 | 4.530003000  | 0.000001000  |
| 6  | -0.118604000 | 3.338831000  | 0.000002000  |
| 1  | -3.936267000 | 3.176739000  | -0.000027000 |
| 1  | -2.821238000 | 5.369778000  | -0.000041000 |
| 1  | -0.301867000 | 5.476975000  | 0.000011000  |
| 1  | 0.965015000  | 3.302263000  | -0.000010000 |
| 6  | -3.927556000 | 0.107957000  | 0.000085000  |
| 6  | -5.114918000 | -2.054293000 | 0.000113000  |
| 6  | -6.336591000 | -1.386362000 | 0.000180000  |
| 6  | -6.361670000 | 0.014016000  | 0.000192000  |
| 6  | -5.181449000 | 0.751195000  | 0.000146000  |
| 1  | -5.253645000 | 1.831831000  | 0.000152000  |
| 1  | -7.314124000 | 0.537298000  | 0.000243000  |
| 1  | -7.264752000 | -1.950892000 | 0.000224000  |
| 1  | -5.082180000 | -3.140226000 | 0.000100000  |
| 8  | 1.143434000  | -1.460089000 | -0.000301000 |
| 6  | 2.404028000  | -1.702911000 | -0.000031000 |
| 6  | 3.433687000  | -0.749718000 | 0.000148000  |
| 6  | 3.312446000  | 0.653756000  | 0.000014000  |
| 8  | 2.210820000  | 1.297916000  | -0.000126000 |
| 6  | 4.599478000  | 1.514261000  | 0.000115000  |
| 6  | 2.769135000  | -3.206479000 | 0.000032000  |
| 6  | 3.597239000  | -3.533286000 | -1.264889000 |
| 6  | 3.596098000  | -3.533340000 | 1.265694000  |
| 6  | 1.497050000  | -4.073783000 | -0.000566000 |
| 6  | 5.431100000  | 1.197509000  | -1.264951000 |
| 6  | 4.245524000  | 3.012014000  | 0.000086000  |
| 6  | 5.430861000  | 1.197496000  | 1.265332000  |
| 1  | 4.441788000  | -1.142227000 | 0.000350000  |
| 1  | 3.834479000  | -4.603799000 | -1.285911000 |
| 1  | 3.036003000  | -3.294185000 | -2.175274000 |
| 1  | 4.541729000  | -2.980878000 | -1.295923000 |
| 1  | 3.833426000  | -4.603832000 | 1.286831000  |
| 1  | 4.540494000  | -2.980822000 | 1.297650000  |
| 1  | 3.033987000  | -3.294380000 | 2.175575000  |
| 1  | 1.779690000  | -5.133059000 | -0.000505000 |
| 1  | 0.880094000  | -3.882652000 | 0.882180000  |
| 1  | 0.880860000  | -3.882554000 | -0.883830000 |
| 1  | 6.329755000  | 1.825933000  | -1.286631000 |
| 1  | 5.753628000  | 0.152135000  | -1.296200000 |
| 1  | 4.855768000  | 1.399541000  | -2.175669000 |
| 1  | 5.166594000  | 3.606463000  | 0.000098000  |
| 1  | 3.662684000  | 3.285218000  | -0.884953000 |
| 1  | 3.662661000  | 3.285242000  | 0.885105000  |
| 1  | 6.329570000  | 1.825838000  | 1.287136000  |
| 1  | 4.855396000  | 1.399615000  | 2.175946000  |
| 1  | 5.753289000  | 0.152091000  | 1.296677000  |

**Table SX.** Cartesian coordinates for the **3** complex in the T<sub>1</sub> excited state optimized by the UB3LYP/Lanl2DZ(Pt)/6-31G(d)(C,N,O,Se,H) method.

|    |              |              |              |
|----|--------------|--------------|--------------|
| 8  | -1.105068000 | 1.516894000  | 0.000373000  |
| 6  | -2.372049000 | 1.722867000  | 0.000639000  |
| 6  | -3.383932000 | 0.749937000  | -0.000166000 |
| 6  | -3.240141000 | -0.648142000 | -0.000548000 |
| 8  | -2.126654000 | -1.267688000 | 0.000138000  |
| 6  | -4.511767000 | -1.531554000 | -0.001777000 |
| 6  | -2.812415000 | 3.210787000  | 0.002091000  |
| 6  | -3.656243000 | 3.496380000  | -1.263377000 |
| 6  | -3.654733000 | 3.493930000  | 1.269129000  |
| 6  | -1.600866000 | 4.156902000  | 0.002252000  |
| 6  | -5.347533000 | -1.228334000 | -1.267429000 |
| 6  | -4.133115000 | -3.023047000 | -0.002232000 |
| 6  | -5.349193000 | -1.229547000 | 1.263074000  |
| 1  | -4.398459000 | 1.123916000  | -0.000311000 |
| 1  | -3.945271000 | 4.554153000  | -1.284317000 |
| 1  | -3.083579000 | 3.285058000  | -2.173583000 |
| 1  | -4.572541000 | 2.899231000  | -1.296062000 |
| 1  | -3.944149000 | 4.551552000  | 1.292261000  |
| 1  | -4.570709000 | 2.896293000  | 1.301936000  |
| 1  | -3.080804000 | 3.281265000  | 2.178227000  |
| 1  | -1.952150000 | 5.195377000  | 0.003824000  |
| 1  | -0.976039000 | 4.009463000  | 0.887854000  |
| 1  | -0.977611000 | 4.011700000  | -0.884847000 |
| 1  | -6.235121000 | -1.872258000 | -1.290467000 |
| 1  | -5.688140000 | -0.188692000 | -1.298126000 |
| 1  | -4.767862000 | -1.419611000 | -2.177702000 |
| 1  | -5.044095000 | -3.632806000 | -0.003233000 |
| 1  | -3.545878000 | -3.286476000 | -0.887397000 |
| 1  | -3.547229000 | -3.287362000 | 0.883561000  |
| 1  | -6.236776000 | -1.873539000 | 1.284363000  |
| 1  | -4.770695000 | -1.421637000 | 2.173921000  |
| 1  | -5.689914000 | -0.189958000 | 1.294285000  |
| 78 | -0.204142000 | -0.353088000 | 0.000062000  |
| 6  | 1.675745000  | 0.256955000  | -0.000282000 |
| 7  | 0.670437000  | -2.181021000 | 0.000354000  |
| 6  | 2.362400000  | 1.500740000  | -0.001148000 |
| 6  | 3.790191000  | 1.427046000  | -0.000791000 |
| 34 | 4.406555000  | -0.399036000 | 0.000668000  |
| 6  | 2.603528000  | -0.894406000 | 0.000420000  |
| 6  | 2.073454000  | -2.181945000 | 0.000673000  |
| 6  | 2.768821000  | -3.422800000 | 0.001167000  |
| 6  | 2.071056000  | -4.606507000 | 0.001309000  |
| 6  | 0.652760000  | -4.573822000 | 0.000959000  |
| 6  | 0.004684000  | -3.346497000 | 0.000488000  |
| 6  | 4.600330000  | 2.541031000  | -0.001483000 |
| 6  | 4.000730000  | 3.818190000  | -0.002648000 |
| 6  | 2.607411000  | 3.931029000  | -0.003130000 |
| 6  | 1.795508000  | 2.799279000  | -0.002416000 |
| 1  | 3.854691000  | -3.413219000 | 0.001398000  |
| 1  | 2.597885000  | -5.555846000 | 0.001670000  |
| 1  | 0.066871000  | -5.485952000 | 0.001058000  |
| 1  | -1.075228000 | -3.260311000 | 0.000207000  |
| 1  | 5.682711000  | 2.447881000  | -0.001158000 |
| 1  | 4.627412000  | 4.705117000  | -0.003194000 |
| 1  | 2.147424000  | 4.915830000  | -0.004084000 |
| 1  | 0.718410000  | 2.881597000  | -0.002823000 |

**Table SX.** Cartesian coordinates for the **6** complex in the  $T_1$  excited state optimized by the UB3LYP/Lanl2DZ(Pt)/6-31G(d)(C,N,O,Se,H) method.

|    |              |              |              |
|----|--------------|--------------|--------------|
| 78 | 0.284052000  | 0.378906000  | -0.013073000 |
| 6  | -1.513369000 | -0.312187000 | -0.057401000 |
| 7  | -0.735840000 | 2.120149000  | -0.014353000 |
| 34 | -2.168116000 | -2.073297000 | -0.110490000 |
| 6  | -3.923739000 | -1.324759000 | -0.002366000 |
| 6  | -2.598786000 | 0.678435000  | -0.011607000 |
| 6  | -2.153428000 | 2.021121000  | -0.045684000 |
| 6  | -2.905232000 | 3.219789000  | -0.140691000 |
| 6  | -2.289653000 | 4.451001000  | -0.150671000 |
| 6  | -0.870396000 | 4.510652000  | -0.070055000 |
| 6  | -0.149074000 | 3.331186000  | -0.016306000 |
| 1  | -3.981416000 | 3.162164000  | -0.236692000 |
| 1  | -2.877259000 | 5.359555000  | -0.231963000 |
| 1  | -0.343690000 | 5.458549000  | -0.067358000 |
| 1  | 0.934690000  | 3.316732000  | 0.019741000  |
| 6  | -3.922399000 | 0.099765000  | 0.061094000  |
| 6  | -5.105088000 | -2.053032000 | 0.036571000  |
| 6  | -6.324875000 | -1.377703000 | 0.156851000  |
| 6  | -6.351556000 | 0.017650000  | 0.252686000  |
| 6  | -5.167850000 | 0.748047000  | 0.210771000  |
| 1  | -5.216270000 | 1.823758000  | 0.320791000  |
| 1  | -7.298375000 | 0.536825000  | 0.368033000  |
| 1  | -7.251712000 | -1.943787000 | 0.188324000  |
| 1  | -5.085977000 | -3.137402000 | -0.018445000 |
| 8  | 1.167583000  | -1.470665000 | -0.015823000 |
| 6  | 2.429952000  | -1.689271000 | 0.003847000  |
| 6  | 3.444195000  | -0.718124000 | 0.029919000  |
| 6  | 3.302983000  | 0.683696000  | 0.040006000  |
| 8  | 2.195281000  | 1.316154000  | 0.026035000  |
| 6  | 4.579666000  | 1.559936000  | 0.070204000  |
| 6  | 2.824242000  | -3.186152000 | 0.000425000  |
| 6  | 3.697353000  | -3.487023000 | -1.240257000 |
| 6  | 3.617128000  | -3.508397000 | 1.288913000  |
| 6  | 1.569336000  | -4.076780000 | -0.047466000 |
| 6  | 5.437050000  | 1.264752000  | -1.182787000 |
| 6  | 4.207062000  | 3.053144000  | 0.076868000  |
| 6  | 5.392889000  | 1.242489000  | 1.346987000  |
| 1  | 4.458180000  | -1.094899000 | 0.044964000  |
| 1  | 3.953189000  | -4.553280000 | -1.263591000 |
| 1  | 3.161416000  | -3.248287000 | -2.165890000 |
| 1  | 4.632961000  | -2.918997000 | -1.236541000 |
| 1  | 3.875738000  | -4.574080000 | 1.308822000  |
| 1  | 4.548089000  | -2.936542000 | 1.355361000  |
| 1  | 3.021628000  | -3.288803000 | 2.182312000  |
| 1  | 1.871011000  | -5.130863000 | -0.046152000 |
| 1  | 0.920731000  | -3.903207000 | 0.815957000  |
| 1  | 0.979162000  | -3.889536000 | -0.949359000 |
| 1  | 6.328012000  | 1.904524000  | -1.183503000 |
| 1  | 5.773026000  | 0.223718000  | -1.217622000 |
| 1  | 4.874890000  | 1.467829000  | -2.101467000 |
| 1  | 5.120584000  | 3.658924000  | 0.097753000  |
| 1  | 3.635540000  | 3.326588000  | -0.815334000 |
| 1  | 3.605336000  | 3.311218000  | 0.953668000  |
| 1  | 6.282743000  | 1.882319000  | 1.390303000  |
| 1  | 4.798742000  | 1.428981000  | 2.248900000  |
| 1  | 5.728359000  | 0.201079000  | 1.374958000  |

- 1 A. D. Becke, *J. Chem. Phys.*, 1993, **98**, 5648–5652.
  - 2 P. J. Hay and W. R. Wadt, *J. Chem. Phys.*, 1985, **82**, 270–283.
  - 3 W. J. Hehre, K. Ditchfield and J. A. Pople, *J. Chem. Phys.*, 1972, **56**, 2257–2261.
  - 4 R. Bauernschmitt and R. Ahlrichs, *Chem. Phys. Lett.*, 1996, **256**, 454–464.
  - 5 J. Tomasi, B. Mennucci and R. Cammi, *Chem. Rev.*, 2005, **105**, 2999–3093.
  - 6 F. Wang and T. Ziegler, *J. Chem. Phys.*, , DOI:10.1063/1.2061187.
  - 7 E. Van Lenthe and E. J. Baerends, *J. Comput. Chem.*, 2003, **24**, 1142–1156.
  - 8 P. K. Samanta, D. Kim, V. Coropceanu and J. L. Brédas, *J. Am. Chem. Soc.*, 2017, **139**, 4042–4051.
  - 9 K. Mori, T. P. M. Goumans, E. Van Lenthe and F. Wang, *Phys. Chem. Chem. Phys.*, 2014, **16**, 14523–14530.
  - 10 G. Baryshnikov, B. Minaev and H. Ågren, *Chem. Rev.*, 2017, **117**, 6500–6537.
-
